# 1 Insertion sequences drive the emergence of a highly adapted 2 human pathogen

3 Erwin Sentausa<sup>1#</sup>, Pauline Basso<sup>1+</sup>, Alice Berry<sup>1</sup>, Annie Adrait<sup>2</sup>, Gwendoline  
4 Bellement<sup>1,2∞</sup>, Yohann Couté<sup>2</sup>, Stephen Lory<sup>3</sup>, Sylvie Elsen<sup>1\*</sup> and Ina Attrée<sup>1\*</sup>

5

6 <sup>1</sup>Université Grenoble Alpes, CNRS ERL5261, INSERM U1036, CEA, Laboratory Biology  
7 of Cancer and Infection, Bacterial Pathogenesis and Cellular Responses, Biosciences  
8 and Biotechnology Institute of Grenoble, 38000 Grenoble, France

9 <sup>2</sup>Université Grenoble Alpes, CEA, Inserm, BIG-BGE, 38000 Grenoble, France

10 <sup>3</sup>Department of Microbiology and Immunobiology, Harvard Medical School, USA

11 <sup>#</sup>Current address: Evotec ID (Lyon) SAS, Marcy l'Étoile, France

12 <sup>+</sup>Current address: Department of Microbiology and Immunology, University of California  
13 San Francisco (UCSF) School of Medicine, USA

14 <sup>∞</sup>Current address: Biozentrum, University of Basel, Basel, Switzerland

15 <sup>\*</sup>Corresponding authors

16 Competing Interests: The authors declare no competing financial interests

17

18 **KEYWORDS:** *Pseudomonas aeruginosa*, adaptation, antibiotic resistance, bacterial  
19 infection, multiomics

20

21

22

23

## 24 **Abstract**

25 Taxonomic outliers of *Pseudomonas aeruginosa* of environmental origin have recently  
26 emerged as infectious for humans. Here we present the first genome-wide analysis of an  
27 isolate that caused fatal hemorrhagic pneumonia. We demonstrate that, in two sequential  
28 clones, CLJ1 and CLJ3, recovered from a patient with chronic pulmonary disease,  
29 insertion of a mobile genetic element into the *P. aeruginosa* chromosome affected major  
30 virulence-associated phenotypes and led to increased resistance to antibiotics used to  
31 treat the patient. Comparative proteome and transcriptome analyses revealed that this  
32 insertion sequence, ISL3, disrupted genes encoding flagellar components, type IV pili, O-  
33 specific antigens, translesion polymerase and enzymes producing hydrogen cyanide.  
34 CLJ3 possessed seven fold more IS insertions than CLJ1, some modifying its  
35 susceptibility to antibiotics by disrupting the genes for the outer-membrane porin OprD  
36 and the regulator of  $\beta$ -lactamase expression AmpD. In the *Galleria mellonella* larvae  
37 model, the two strains displayed different levels of virulence, with CLJ1 being highly  
38 pathogenic. This work reveals ISs as major players in enhancing the pathogenic potential  
39 of a *P. aeruginosa* taxonomic outlier by modulating both, the virulence and the resistance  
40 to antimicrobials, and explains the ability of this bacterium to adapt from the environment  
41 to a human host.

42

43

44

45

## 46 **Introduction**

47 Emerging infectious diseases caused by multidrug resistant bacteria represent a serious  
48 threat for human well-being and health. Several hundred novel pathologies caused by  
49 infectious agents have been reported during the last forty years (1). Environmental  
50 bacteria can adapt to a human host by acquisition of virulence determinants through  
51 chromosomal rearrangements due to mobile genetic elements, horizontal gene transfer,  
52 or small local sequence changes including single nucleotide substitutions, or horizontal  
53 gene transfer (2, 3).

54 The *Pseudomonas* genus is one of the most important groups of bacteria thriving in  
55 diverse environments capable of causing plant or animal diseases. Species such as *P.*  
56 *aeruginosa*, *Pseudomonas fluorescens*, and *Pseudomonas syringae* adversely impact  
57 human health and agriculture (4-6). *P. aeruginosa* is a particularly successful  
58 opportunistic pathogen found frequently in humid environments associated with human  
59 activities. In hospital settings, infections caused by multi-resistant *P. aeruginosa* strains  
60 present a real danger for elderly individuals, patients undergoing immunosuppressive  
61 therapies and those requiring treatment with invasive devices in Intensive Care Units. In  
62 addition to acute infections, *P. aeruginosa* is a common cause of chronic wound infections  
63 as well as long lasting respiratory infections of patients with cystic fibrosis (CF) and  
64 chronic obstructive pulmonary disease (COPD). During chronic infections the bacteria  
65 adapt to the particular host environment by changing metabolic pathways and synthesis  
66 of virulence-associated components (7). Additionally, in-patient evolution involves  
67 acquisition of loss-of-function mutations in genes of motility, antibiotic resistance, acute  
68 virulence and envelope biogenesis (8-12).

69 Recent massive whole genome sequencing allowed classification of clinical and  
70 environmental *P. aeruginosa* strains in three clades (13, 14). The pathogenic strategies  
71 of the three clades rely on different toxins. The two most populated clades inject the  
72 toxins, also referred to as effectors ExoS, ExoT, ExoY, and ExoU, directly into host cell  
73 cytoplasm through a complex molecular syringe using type III secretion system (T3SS)  
74 (15). The third clade is occupied by taxonomic outliers that lack all the genes encoding  
75 the effectors and the components of the T3SS. The first fully sequenced taxonomic  
76 outlier, PA7, was multi-drug resistant and non-virulent in an acute lung infection mouse  
77 model (16, 17). Other PA7-related strains were mainly of environmental origin (18, 19) or  
78 associated with both, acute (wounds and urinary tract) and chronic (CF and COPD)  
79 human infections (20-22). They recently emerged as highly virulent for humans potentially  
80 through the secretion of a pore-forming toxin Exolysin, ExlA (16, 21-23). The most  
81 pathogenic *exlA*<sup>+</sup> *P. aeruginosa* strain described up to date is the strain CLJ1 isolated at  
82 the University Hospital in Grenoble, France, from a COPD patient suffering from  
83 hemorrhagic pneumonia (16). In murine acute lung infection model, CLJ1-infected lungs  
84 featured an extensive damage to endothelial monolayers, bacteria transmigrated into the  
85 blood and disseminated into secondary organs without being detected by the immune  
86 system. This differs greatly from consequences observed by the T3SS<sup>+</sup> strain PAO1 (16,  
87 24).

88 To get insights into molecular determinants of pathogenesis expressed by the Exolysin-  
89 producing *P. aeruginosa* taxonomic outliers and to assess the extent of evolutionary  
90 adaptation during the course of infection, we performed a comprehensive comparative  
91 genome-wide study of two clonal variants, CLJ1 and CLJ3, isolated from the same patient

92 at different time-points during hospitalization. The gathered data demonstrated that  
93 mobile genetic elements belonging to the ISL3 family insertion sequences (IS), originally  
94 found in soil bacteria *Pseudomonas stutzeri* and *Pseudomonas putida*, shape the  
95 virulence traits and strategies employed by those strains to colonize and to adapt to the  
96 human host.

97

## 98 **Materials and methods**

### 99 **Bacterial strains and culture conditions**

100 *P. aeruginosa* strains used in this study are CLJ1 and CLJ3 (16). Bacteria were grown at  
101 37°C in liquid Lysogeny Broth (LB) medium (10 g/L Bacto tryptone, 5 g/L yeast extract,  
102 10 g/L NaCl) with agitation until the cultures reached an optical density at 600 nm (OD<sub>600</sub>)  
103 of 1.0 unless indicated. For the assessment of c-di-GMP levels, pUCP22-*pcdrA*-  
104 *gfp*(ASV)<sup>c</sup> was introduced into CLJ1 and CLJ3 strains by electroporation, as previously  
105 described (25), and selected on LB agar plates containing 200 µg/mL of carbenicillin.

### 106 **Genome analysis**

107 The details on sequencing, assembly, annotation and comparison are described in  
108 Supplementary materials and methods. The assembly and annotation statistics for the  
109 CLJ1 and CLJ3 genomes are presented in Table S1. Functional annotation was  
110 performed on the Rapid Annotations based on Subsystem Technology (RAST) Genome  
111 Annotation Server version 2.0 (26) using Classic RAST annotation scheme and  
112 GLIMMER-3 gene caller. Manual curation was done based on the annotations of  
113 orthologous genes in PA7 and PAO1 strains from the *Pseudomonas* Genome Database  
114 (27). Circos 0.69-3 (28) was used to create multiomic data visualizations in Fig. 1 and

115 Fig. S1. The whole genome shotgun projects of CLJ1 and CLJ3 have been deposited at  
116 DDBJ/ENA/GenBank under the accessions PVXJ000000000 and PZJI000000000,  
117 respectively.

### 118 **Identification of insertion sites for IS elements**

119 CLJ-ISL3 insertion locations in the gaps between CLJ3 contigs were detected by  
120 checking for the inverted repeat sequences at the contigs' ends, while accounting for the  
121 shared gene synteny between CLJ1, PA7 and PAO1 genomes. We also used panISa  
122 version 0.1.0 (<https://github.com/bvalot/panISa>) with default parameters to search for ISs  
123 in CLJ3 reads, mapped using BWA-MEM algorithm from BWA version 0.7.15 (29) to PA7  
124 and CLJ1 genomes, respectively.

### 125 **Transcriptome**

126 The RNA for RNA-Seq was prepared as described (30) from bacterial cultures grown in  
127 duplicates in LB to OD<sub>600</sub> of 1. The preparations of the Illumina libraries and sequencing  
128 were done by standard procedures at the Biopolymer Facility, Harvard Medical School,  
129 Boston, USA. The analysis was done as described in Supplementary materials and  
130 methods.

### 131 **Mass spectrometry-based quantitative proteomic analyses**

132 Samples for proteomics were prepared and analysed by nanoliquid chromatography  
133 coupled to tandem mass spectrometry (Ultimate 3000 coupled to LTQ-Orbitrap Velos Pro,  
134 Thermo Scientific) as described previously (31) with slight modifications, as described in  
135 Supplementary materials and methods. Each fraction was controlled by western blot,

136 using appropriate antibodies. The protein content in total, membrane, and secretome  
137 proteomes of CLJ1 and CLJ3 were analyzed independently from the others. Statistical  
138 analyses were performed using ProStaR (32). In total, a list of 2 852 quantified proteins  
139 was obtained. The mass spectrometry proteomics data have been deposited to the  
140 ProteomeXchange Consortium via the PRIDE (33) partner repository with the dataset  
141 identifier PXD011105.

## 142 **Phenotypic analyses**

143 HCN production was assessed on induction plate containing arginine (HCN precursor) as  
144 previously described (22). To monitor the c-di-GMP levels, the fluorescence-based  
145 reporter plasmid pUCP22-p*CdrA-gfp*(ASV)<sup>c</sup> was used (34). Bacteria carrying the plasmid  
146 were subcultured at OD<sub>600nm</sub> of 0.05 in black 96-well plate with clear bottom, and  
147 incubated at 37°C and 60 rpm in the Fluoroskan reader. The fluorescent emission was  
148 measured every 15 min at 527 nm following an excitation at 485 nm for 6 h. Serum  
149 sensitivity was assessed by a protocol adapted from (35). Two different human sera from  
150 the Etablissement Français du Sang (EFS) were used in all experiments. Overnight  
151 cultures of CLJ1 and CLJ3 bacteria were pelleted at 3,000 rpm for 5 min and suspended  
152 in Hanks Balanced Salt Solution (HBSS, GIBCO) with 0.1% of gelatin and adjusted to 10<sup>8</sup>  
153 colony forming units (CFU) per mL. The bacteria (10<sup>6</sup>) were incubated in presence of 10%  
154 of human serum in a final volume of 3 mL for 15 min or 30 min at 37°C under gentle  
155 agitation. A control with heat inactivated serum at 56°C for 30 min was done. CFU were  
156 determined at 0, 15, and 30 min by serial dilutions and spreading on LB plates.

157

158

## 159 **Infections of *Galleria mellonella* larvae**

160 The calibrated wax moth larvae *Galleria mellonella* were purchased from the French  
161 company Sud-Est Appats (<http://www.sudestappats.fr>). Healthy, uniformly white larvae,  
162 measuring around 3 cm were selected for infection. The bacteria were grown until the  
163 OD<sub>600</sub> of 1 and diluted in PBS to approximately 10<sup>3</sup> bacteria/mL. Insulin cartridges were  
164 sterilized and filled with bacterial solutions. The larvae were injected with 10 µL of  
165 bacterial suspensions using the insulin pen. The exact number of bacteria used in pricking  
166 was obtained by spotting five times 10 µL with the pen on agar plates and by counting  
167 colony-forming units after growth at 37°C. The infected animals were placed in petri  
168 dishes and set at 37°C. The dead larvae were counted over indicated period. Twenty  
169 larvae were used per condition and the experiment was performed twice.

## 170 **RT-qPCR**

171 To quantify selected transcripts, total RNA from 2.0 mL of cultures (OD<sub>600</sub> of 1.0) was  
172 extracted with the TRIzol Plus RNA Purification Kit (Invitrogen) then treated with DNase I  
173 (Amplification Grade, Invitrogen). RT-qPCR was performed as described (36) with few  
174 modifications as described in Supplementary materials and methods. The sequences of  
175 primers were designed using Primer3Plus ([http://www.bioinformatics.nl/cgi-](http://www.bioinformatics.nl/cgi-bin/primer3plus/primer3plus.cgi/)  
176 [bin/primer3plus/primer3plus.cgi/](http://www.bioinformatics.nl/cgi-bin/primer3plus/primer3plus.cgi/)) and are given in Table S2.

177

178

179

180



## 181 **Results**

### 182 **Analysis of the CLJ1 genome and its regions of genomic plasticity**

183 Strain CLJ1, an antibiotic-sensitive *P. aeruginosa*, was isolated from the patient with  
184 necrotizing hemorrhagic pneumonia. Twelve days later, after initiating antibiotic therapy  
185 the patient condition worsened and at this time CLJ3, a multidrug resistant clonal variant,  
186 was isolated (16). We have also shown that CLJ1 is a cytotoxic strain that shares the  
187 main genomic features with the first fully sequenced antibiotic resistant taxonomic outlier  
188 PA7 (16, 17). Notably, CLJ1 lacks the entire locus encoding the T3SS machinery and the  
189 genes encoding all known T3SS effectors; however, it carries the determinant for the two-  
190 partner secretion pore-forming toxin, Exolysin. To initiate genome-wide studies on  
191 mechanisms conferring the specific phenotypes of CLJ1, we fully sequenced the genome  
192 of this strain and compared it to PA7. As expected, most of the core genes of CLJ1 are  
193 similar to PA7 (Fig. 1 and Fig. S1). However, the content and the distribution of several  
194 regions of genomic plasticity (RGPs) (37) are different. CLJ1 genome contains 15 regions  
195 that are absent from the PA7 genome and lacks 26 PA7-specific regions. Among  
196 differences between CLJ1 and PA7 genomes there is a putative integrated plasmid  
197 carrying several genes that confers aminoglycoside resistance, regions encoding two  
198 type I restriction-modification systems, a pyocin protein, and a mercury resistance system  
199 (Tables S3 and S4). All CLJ1 specific regions (CLJ-SR), except CLJ-SR14, are present  
200 in other *P. aeruginosa* strains, some being phylogenetically unrelated to the PA7 strain.  
201 Strikingly, CLJ-SR14 carries 55 genes, many predicted to encode proteins involved in  
202 metabolism and resistance to heavy metals (Table S5), suggesting environmental origin

203 of the strain. Modifications in three replacement islands (38, 39) can mediate the CLJ1-  
204 specific phenotype. The CLJ replacement island in RGP60 (harboring pilin and pilin  
205 modification genes) carries a group I pilin allele, unlike PA7 that has a group IV allele  
206 (40). CLJ1 encodes, within RGP9, a b-type flagellin as the principal component of its  
207 flagellum, while PA7 possesses a-type flagellin (17). Both, RGP9 containing the flagellin  
208 glycosylation genes and the replacement island in RGP31 bearing the O-specific antigen  
209 (OSA) biosynthesis gene cluster are further modified in CLJ strains (see below). While  
210 most of the genes within RGP7 (pKLC102-like island) are missing in CLJ1, the so-called  
211 Dit island previously found in a CF isolate of *P. aeruginosa* (37) is inserted in 5' region of  
212 RGP27 at the tRNA<sup>Gly</sup>. The determinants encoded in this island provide the bacteria the  
213 ability to degrade aromatic diterpenes, which are tricyclic resin acids produced by  
214 wounded trees, and to use them as sole carbon and energy source (41). The Dit island  
215 is uncommon in the genomes of *P. aeruginosa* strains, but it is frequently present in  
216 different soil bacteria such as *Burkholderia xenovorans*, *P. fluorescens*, and  
217 *Pseudomonas mendocina*, further implying the environmental origin of the CLJ1 strain.  
218 Among potential virulence-associated genes, CLJ1 lacks one of the type 6 secretion  
219 system loci (*PSPA7\_2884-2917*) encoding an injection machine for toxins active against  
220 both, prokaryotes and eukaryotic cells (42). The *plcH* and *plcR* genes, coding for the  
221 hemolytic phospholipase C precursor and its accessory protein respectively, are also  
222 absent from the CLJ1 genome. Whereas *cupA* fimbrial gene cluster (*CLJ1\_2899-2903*;  
223 *PSPA7\_3019-3023*) is present in the remodeled RGP23, the entire *cupE1-6* operon  
224 (*PSPA7\_5297-5302*) encoding cell surface fimbriae involved in the maintenance of a  
225 biofilm structure (43) is missing.

## 226 **Evidence of mobile genetic elements in the key pathogenic regions**

227 Following infection, CLJ1 strain provokes striking damage to mouse lung tissues without  
228 an immunological response by the host (24). The sequential isolate CLJ3 was sampled  
229 from the same patient after a series of aggressive antibiotic treatments and displayed  
230 different cytotoxicity and antibiotic-sensitivity profiles compared to CLJ1 (16). The  
231 genomes of these two strains are almost identical, with a reciprocal best-hit average  
232 nucleotide identity (44) between them estimated to be 99.97% (Fig. 1). When analyzing  
233 the genomes of CLJ1 and CLJ3, the most striking feature is the presence of multiple  
234 copies of a 2,985-bp fragment corresponding to a mobile genetic element, absent from  
235 the reference PA7 genome. This sequence is 99% identical to ISL3 family of insertion  
236 sequences ISPst2 of *Pseudomonas stutzeri*, ISpu12 of *Pseudomonas putida* and IS1396  
237 of *Serratia marcescens* found in the ISfinder database (45). However, besides coding for  
238 a transposase, this CLJ-ISL3 encodes a putative inner membrane protein with seven  
239 transmembrane helices from the permease superfamily cl17795 (with the conserved  
240 domain COG0701 (46)) and a putative transcriptional metalloregulator of the ArsR family  
241 (Fig. 2A). The element is flanked by a pair of 24-bp imperfect inverted repeat sequences  
242 GGGTATCCGGAATTTCTGGTTGAT (left inverted repeat, IRL) and  
243 GGGTATACGGATTTAATGGTTGAT (right inverted repeat, IRR). Examination of publicly  
244 available genome sequences showed that the complete CLJ-ISL3 is also present in a few  
245 other bacteria, including a multi-drug resistant *Acinetobacter baumannii* isolate recovered  
246 from bronchoalveolar lavage fluid (47).

247 Altogether, we found CLJ-ISL3 in six and forty copies in the genomes of CLJ1 and CLJ3,  
248 respectively. The presence of ISs in CLJ3 genome was predicted using a combination of

249 bioinformatics tools, analysis of genome synteny and detection of inverted sequence  
250 (see Materials and Methods). In agreement with the clonal origin of the strains, all CLJ-  
251 ISL3 of CLJ1, but one, were located in the same location in CLJ3 genome (Fig. 1 and  
252 Table S6). Mass spectrometry (MS)-based quantitative proteomic analyses revealed a  
253 strong increase in the level of the transposase protein in CLJ3 compared to CLJ1, that  
254 might explain the IS expansion within its genome (Table S7). As mobile genetic elements  
255 greatly contribute to phenotypic modifications by changing the gene expression or by  
256 gene inactivation (49, 50), we examined their impact on global gene expression and  
257 particular phenotypes. To that aim, we compared CLJ1 and CLJ3 transcriptomes and  
258 proteomes using respectively RNA-Seq and MS-based quantitative proteomics. The  
259 proteomes of three different bacterial fractions (whole bacteria, total membranes, and  
260 secretomes) were analyzed. Stringent statistical analyses of extracted data revealed 77  
261 differentially expressed genes/proteins between CLJ1 and CLJ3, both at levels of mRNA  
262 and protein (Fig. 1, Tables S7, S8 and S9). Out of these, 27 (35%) are of phage origin,  
263 while 32 (42%) are predicted to be localized in bacterial membranes, periplasm or  
264 secreted.

265

### 266 **Contribution of CLJ-ISL3 to antibiotic resistance of the CLJ3 strain**

267 The CLJ1 and CLJ3 strains are recent isolates obtained from the patient treated with high  
268 doses of different antibiotics without successfully eliminating the infection. CLJ1, isolated  
269 before the beginning of the antibiotic therapy, was sensitive to the tested antibiotics, while  
270 CLJ3 displayed resistance to most of the antibiotics administered to the patient (16). To

271 gain insight into mechanisms of antibiotics resistance of CLJ3, we examined the genomic  
272 data for gene modifications that could explain the switch in phenotypes to selected  
273 antibiotics. We observed that several genes encoding proteins potentially conferring  
274 antibiotic resistance are modified by ISs.

275 As the patient was given different antibiotics of the  $\beta$ -lactam family (ticarcillin,  
276 carbapenem, cephalosporin...) and the CLJ3 isolate developed the resistance to all of  
277 them, we examined the status of the outer membrane porin OprD (CLJ1\_4366) and the  
278 chromosomal-encoded AmpC  $\beta$ -lactamase (CLJ1\_0728), the two major determinants of  
279 intrinsic resistance to this group of antibiotics. We found that *oprD* gene was interrupted  
280 by the CLJ-ISL3 (Fig. 2B) resulting in absence of the protein (Table S7). Loss-of-function  
281 mutations or deletions in *oprD* are commonly seen in isolates from patients undergoing  
282 treatment with imipenem or meropenem (51-54) making the cell envelope impermeable  
283 to these antibiotics. Additionally, the identical ISL3 element was found in the 5' portion of  
284 the *ampD* gene (Fig. 2C), encoding the recycling amidase responsible for the production  
285 of muropeptide regulators of *ampC* expression (55, 56). Consequently, although higher  
286 expression of *ampC* gene was not detected in RNA-Seq, the CLJ3 proteomes contained  
287 significantly higher amounts of the AmpC protein compared to those of CLJ1 (Table S7).

288 Two additional periplasmic proteins involved in peptidoglycan recycling and biosynthesis,  
289 the AmpDH3 amidase (CLJ1\_5671) (57) and the lytic transglycosylase MltA-interacting  
290 protein MipA (CLJ1\_3357) (58), were overrepresented in the CLJ3 proteome. In  
291 agreement, our datasets also pointed to the overexpression of corresponding genes,  
292 further confirmed by RT-qPCR (Fig. 2D). The overproduction of these proteins in a clinical  
293 strain suggests their role in adaptation of the strain to host through modulation of

294 peptidoglycan synthesis. However, the molecular mechanisms involved in their increased  
295 expression and the significance of their overexpression in bacterial persistence in the host  
296 need to be determined.

297 All *P. aeruginosa* strains carry genes for multiple efflux pumps. The CLJ1/PA7 clade  
298 possesses the locus encoding the MexXY-OprA efflux pump which is able to transport  
299 multiple antibiotics including fluoroquinolones, aminoglycosides, and certain  
300 cephalosporins (reviewed in (59)). However, when compared to CLJ1, there is a *ca.* 20kb  
301 deletion in the CLJ3 genome (with a loss of 22 genes corresponding to *PSPA7\_3247-*  
302 *3268*) eliminating the entire transcriptional repressor *mexZ* gene and truncating the *mexX*  
303 (Fig. 2E). The deleted region is replaced by a copy of CLJ-ISL3 that is bordered by  
304 truncated *puuP* and *mexX*. One plausible explanation for the observed genomic  
305 arrangement of this region in CLJ3 is that the strain was derived from a yet un-identified  
306 clonal strain that had another copy of ISL3 in *mexX*. A recombination between these two  
307 IS elements resulted in the 20 kb deletion, simultaneously eliminating the repressor and  
308 a portion of *mexX* genes, making this efflux pump nonfunctional. The truncation of the  
309 *puuP* gene encoding putrescine importer/permease indicates that the CLJ-ISL3  
310 sequence affects transport of polyamine, which have multiple roles in pathogen biology,  
311 including resistance to some antibacterial agents (60).

312

### 313 **Modifications of the O-specific antigens (OSA) cluster due to ISs**

314 OSA is a component of lipopolysaccharide (LPS) and an integral component of the *P.*  
315 *aeruginosa* cell envelope. The OSA biosynthetic gene cluster of CLJ in RGP31 is similar

316 in content to that of PA7, consequently both PA7 and CLJ1 belong to serotype O12 (22).  
317 However, insertion of two different ISs alters the gene content and expression levels of  
318 the encoded proteins (Fig. 3A). In CLJ1, the ISL3 element was found within the gene  
319 encoding NAD-dependent epimerase/dehydratase (CLJ1\_1762 corresponding to  
320 PSPA7\_1970), whereas in the corresponding CLJ3 locus two copies were present, one  
321 disrupting *wbjL* and the second located in the intergenic region between *CLJ3\_1919* and  
322 *CLJ3\_1920* (PSPA7\_1972). Moreover, in CLJ3, two copies of another IS from the IS66  
323 family were also found within the gene *wbjB* (CLJ1\_1771; CLJ3\_1930) and downstream  
324 of *wbjM* (CLJ1\_1778; CLJ3\_1936). These insertions negatively affect expression of these  
325 genes, or mRNA stability, as their mRNA and protein levels were higher in CLJ1 than in  
326 CLJ3 (Tables S7 and S8).

327 Furthermore, some other proteins encoded in the 3' part of the OSA cluster, i.e.  
328 CLJ1\_1767 (PSPA7\_1975), WbjB (CLJ1\_1771), WbjC (CLJ1\_1772), WbjI (CLJ1\_1773)  
329 and WbjJ (CLJ1\_1774) were more abundant in CLJ1 (Table S7). Analogous variations  
330 of the OSA loci leading to variability of O-antigens have been reported (61, 62).  
331 Interestingly, the previously described deletion at the *mexX-puuP* locus in CLJ3  
332 encompasses also the *galU* gene (CLJ1\_3121, Fig. 2E), encoding UDP glucose  
333 pyrophosphorylase (63) that adds sugar moieties onto the inner core on lipid A, serving  
334 as the anchor for the full length LPS. The LPS truncation due to absence of *galU* leads to  
335 a so-called rough LPS, higher susceptibility to serum-mediated killing and reduced *in vivo*  
336 virulence (64). The CLJ3 strain was non-agglutinable and sensitive to serum compared  
337 to the CLJ1 strain (Fig. 3B). The *in vivo* selection for acquisition of a serum sensitivity  
338 phenotype is unclear but it may reflect the adaptation of CLJ3 to the host environment

339 through resistance to phages and antibiotic challenges, as it has been reported for some  
340 other clinical strains (65). Modification in LPS structures in *P. aeruginosa* strains  
341 chronically infecting CF patients is considered as an adaptation mechanism to a more  
342 “persistent” lifestyle, with the LPS molecule being less inflammatory (64). Thus, multiple  
343 mechanisms contributed to final LPS structure in CLJ clones. Those events could have  
344 provided to strains variable advantages during infection process such as resistance to  
345 antimicrobials or altered recognition by the immune system.

346

### 347 **ISs determine the repertoire of surface appendices**

348 Inspection of CLJ1 and CLJ3 genome sequences showed that CLJ-ISL3 has strongly  
349 affected the flagellar biosynthetic locus in both strains. The CLJ3 genome revealed an  
350 organization and gene content of the flagellar locus similar to that found in PAO1, which  
351 synthesizes a b-type flagellum (66), but with two copies of CLJ-ISL3 (Fig. 4A). The first  
352 IS interrupts *flgL* (*CLJ1\_4222*), encoding the flagellar hook-associated protein that  
353 enables the anchoring of the flagellum to the cell envelope (67), while the second IS  
354 element is in *fgtA* (*CLJ1\_4219*) coding for the flagellin glycosyl transferase. The two ISs  
355 seem to have recombined in CLJ1 creating a deletion between truncated *fgtA* and *flgL*  
356 genes (Fig. 4A). This recombination event suggests that CLJ1 is not the direct ancestor  
357 of CLJ3, but that the two strains evolved from a common ancestor. The absence of  
358 flagellum is in agreement with the non-motile phenotype of the strain observed during  
359 eukaryotic cell infection and on soft agar (22). Bacterial flagella also modulate immune  
360 response during the infection, because the major flagellar subunit flagellin binds to TLR5  
361 and initiates the TLR-dependent signaling and activation of expression of pro-



362 inflammatory cytokines (68). The absence of assembled flagella in the isolates explains  
363 the lack of detectable pro-inflammatory cytokine interleukin-1 $\beta$  (IL-1 $\beta$ ) and TNF in  
364 bronchoalveolar lavages of CLJ1-infected mice (23, 24). CLJ1 is also devoid of twitching  
365 mobility (22); therefore we examined the genomic data for possible mutations in genes  
366 encoding type IV pili (T4P) and found an insertion of CLJ-ISL3 within the 5' part of *pilM*  
367 gene in both CLJ1 and CLJ3 genomes (Fig. 4B). This gene, encoding a cytoplasmic actin-  
368 like protein, is the first gene of the *pilMNOPQ* operon reported to be essential for both  
369 T4P biogenesis and twitching motility (69). Expression of the entire operon, likely due to  
370 the polar effect of the IS element on the downstream genes, seems to be affected since  
371 no proteins were detected by proteomic analysis, unlike many other Pil proteins encoded  
372 in other operons (Table S7). This finding was intriguing as the action of the toxin Exolysin  
373 relies greatly on T4P in another *exlA+* strain, IHMA87 (70). Therefore, we examined CLJ1  
374 proteomes for the presence of other putative adhesive molecules that may substitute for  
375 the T4P function during host cell intoxication. Based on proteomic datasets, the CLJ1  
376 strain synthesizes components of five two-partner secretion (TPS) systems whose  
377 predicted secreted components are annotated as haemolysins/haemagglutinins,  
378 including the Exolysin (CLJ1\_4479) responsible for CLJ1 cytotoxicity. CdrA and CdrB  
379 (CLJ1\_4999 and CLJ1\_5000) are significantly overrepresented in the CLJ3 strain as  
380 revealed by proteomics and RNA-Seq analysis (Tables S7 and S8). In the PAO1 strain,  
381 the adhesin CdrA is regulated by the secondary messenger cyclic-di-GMP (c-di-GMP),  
382 and its expression is increased in biofilm-growing condition (71). We assessed the cellular  
383 levels of c-di-GMP by using a reporter that is based on the transcriptionally fused c-di-  
384 GMP-responsive *cdrA* promoter to a gene encoding unstable green fluorescent protein

385 (34). The *pcdrA-gfp* (ASV)<sup>C</sup> monitoring plasmid clearly showed higher levels of the second  
386 messenger in CLJ3 during growth (Fig. 4C), suggesting that CLJ3 may have adapted to  
387 host conditions by switching to biofilm lifestyle. Another TpsA protein detected in CLJ  
388 secretomes is CLJ1\_4560, a HMW-like adhesin recently named PdtA in the PAO1 strain.  
389 PdtA plays a role in *P. aeruginosa* virulence as demonstrated by using *Caenorhabditis*  
390 *elegans* model of infection (72). The production of five TPSs, including the protease LepA  
391 (CLJ1\_4911) (73) and at least one contact-dependent inhibition protein Cdi (CLJ1\_2745)  
392 (74, 75), in CLJ strains (Table S7) indicates that this family of proteins may play an  
393 important role during colonization and infection, but their respective contributions in  
394 adhesion, cytotoxicity, or inter-bacterial competition during infection process need to be  
395 investigated.

396

### 397 **Other putative virulence factors, phages and metabolism**

398 RNA-Seq results supported by proteomics data showed an increase in expression of the  
399 enzymes HcnB (CLJ1\_2955) and HcnC (CLJ1\_2954) in the CLJ1 strain (Table S9). The  
400 inspection of the *hcn* operon revealed that the CLJ-ISL3 element was inserted in the 5'  
401 part of the *hcnB* gene in CLJ3 genome (Fig. 5A), in agreement with absence of expression  
402 measured using RT-qPCR (Fig. 5B). The *hcn* genes encode the subunits of hydrogen  
403 cyanide (HCN) synthase that produce this toxic secondary metabolite (76). To detect the  
404 HCN produced by the strains, a paper impregnated with a reaction mixture containing  
405 Cu<sup>2+</sup> ions was placed above bacteria seeded onto agar plates, a white-to-blue color  
406 transition being indicative of HCN in the gas phase. In agreement with proteomic data,

407 CLJ1 was able to produce HCN in higher quantities than CLJ3 and other *P. aeruginosa*  
408 strains from the *exlA*<sup>+</sup> collection (Fig. 5B, (22)). Many *P. aeruginosa* isolates from  
409 individuals with CF produce high levels of HCN (77) and the molecule has been detected  
410 in the sputum of *P. aeruginosa*-infected CF and bronchiectasis patients (78, 79). HCN is  
411 also a regulatory molecule, capable of inducing and repressing other genes (80),  
412 including a cluster of genes *PA4129-PA4134* in PAO1. This cluster (*CLJ1\_0701-*  
413 *CLJ1\_0708*) is expressed at higher levels in CLJ1 compared to CLJ3 as revealed by  
414 RNA-Seq and quantitative proteomics (Fig. 1, Tables S7 and S8) and confirmed for  
415 *ccoG2* and *ccoN4* genes by RT-qPCR (Fig. 5C). The *ccoN4* gene belongs to the *ccoN4Q4*  
416 operon, one of the two *ccoNQ* orphan gene clusters present in *P. aeruginosa* genome.  
417 Its upregulation in the cyanogenic CLJ1 is in agreement with the study showing that,  
418 although *P. aeruginosa* encodes a cyanide-insensitive oxidase CIO, isoforms of *cbb*<sub>3</sub>-type  
419 cytochrome *c* oxidase containing CcoN4 subunit were produced in response to cyanide,  
420 exhibiting higher tolerance towards this poisonous molecule in low-oxygen conditions  
421 (81).

422 Examining the data for differential expression of putative virulence determinants indicated  
423 that CLJ3 overproduces Lipotoxin F (LptF, CLJ1\_1186), an outer-membrane protein  
424 contributing to adhesion to epithelial A549 cells and known to activate host inflammatory  
425 response (82). The *lptF* gene is located in a putative operon together with a gene  
426 encoding a hypothetical protein predicted to be a lipoprotein located in the periplasm  
427 (CLJ1\_1187) that was found upregulated in CLJ3 strain by proteomic analyses (Table  
428 S7). As *lptF* upregulation was not detected by initial RNA-Seq, we performed RT-qPCRs  
429 that demonstrated significant overexpression of both genes *lptF* and

430 *CLJ1\_1187/CLJ3\_1413* in CLJ3 (Fig. 5C) suggesting that Lipotoxin F together with  
431 *CLJ1\_1187* contributed to bacterial adaptation to in-patient environments which is in  
432 agreement with increased *lptF* expression in CF isolates (83).

433 Finally, prophages play important roles in *P. aeruginosa* physiology, adaptation and  
434 virulence (38, 84, 85). In the CLJ genomes, there are at least eight regions related to  
435 phages (Table S10) and five of them are different or absent from PA7 (Table S3).  
436 Transcriptomic and proteomic approaches revealed that twenty-seven phage-related  
437 proteins from *CLJ1\_0539-0556* in RGP3 and *CLJ1\_4296-4314*, including CLJ-SR11, are  
438 significantly more abundant in CLJ3 compared to CLJ1 (Tables S7, S8 and S9).  
439 Interestingly, the genes encoding bacteriocins, namely pyocins S2, S4, and S5, are  
440 absent from CLJ strains. Nevertheless, the activator of pyocin biosynthetic genes, PrtN  
441 (*CLJ1\_0535*) (86), is more highly expressed in CLJ3 than in CLJ1. Indeed, the *prtN* gene  
442 is located in a region encoding phage-related proteins which is activated in CLJ3 (Fig. 1,  
443 Table S9). In both CLJ genomes, we also identified the genes for AlpR (*CLJ1\_4295*,  
444 *CLJ3\_4269*) and AlpA (*CLJ1\_4296*, *CLJ3\_4268*), transcriptional regulators of a  
445 programmed cell death pathway in PAO1 (87). Finally, *alpA* and all the genes of the  
446 *alpBCDE* lysis cassette are highly expressed in CLJ3, and we noticed high propensity of  
447 this strain for lysis (Fig. 1, Table S9).

448

#### 449 **CLJ-ISL3 inactivates the *imu* operon encoding translesion synthesis machinery**

450 Another location of the ISL3 element in the CLJ1 and CLJ3 genomes is within the *imu*  
451 operon also named the “mutagenesis” cassette (Fig. 5D). The *imu* operon encodes the

452 ImuC polymerase (formerly called DnaE2) and other components of translesion synthesis  
453 (TLS), which can bypass lesions caused by DNA damage, and consequently, is  
454 mutagenic. The ImuC polymerase in *Pseudomonas* contributes to the tolerance to DNA  
455 alkylation agents (88), and the inactivation of the operon could limit accumulation of  
456 mutations. Interestingly, CF *P. aeruginosa* isolates frequently display a hyper-mutator  
457 phenotype, that is primary due to inactivation of *mutS* and has been previously suggested  
458 as being advantageous for bacterial adaptation to the CF lungs (89). The *mutS* gene is  
459 identical and intact in CLJ1 and CLJ3 and the predicted proteins differ by one amino acid  
460 at position 593 from MutS of PA7 (threonine in PA7, serine in CLJ1/CLJ3). Therefore, the  
461 physiological impact of inactivation of the translesion synthesis system is unclear. Two  
462 additional DNA-repair proteins, RecN (CLJ1\_5150) and RecA (CLJ1\_1263), were found  
463 overrepresented in CLJ3 at the transcriptome and proteome levels (Table S9), suggesting  
464 the interplay between different ways of defense mechanism against uncontrolled  
465 mutational rates induced by the hostile environment. We found more than 600 single  
466 nucleotide polymorphisms (SNPs) between CLJ1 and CLJ3. This is about six times higher  
467 compared to sequential isolates found in the same CF patients over 8.8 years in one  
468 study (10) and almost 10 times higher than mutations in a matched isolate pair, collected  
469 7 and 1/2 years apart from a single patient in another study (12) . However, another study  
470 showed that some strains isolated from non-CF patients could share between 176 and  
471 736 SNPs (9). Although we could not precisely account for the role of SNPs, they may  
472 contribute to differences in gene expression between the two isolates that could not be  
473 directly attributed to ISs.

474

## 475 **Two CLJ clones show different pathogenic potential in *Galleria mellonella***

476 To assess the global virulence of the two strains in a whole organism, we used wax moth  
477 *Galleria* infection model, and followed the survival of infected larvae following inoculation  
478 with different strains. Under the same infection conditions, the CLJ1 strain was found  
479 more virulent than the PA7 strain, while CLJ3 was unable to kill *Galleria* larvae (Fig. 5E).  
480 This result shows that CLJ3, while gaining resistance to antimicrobials, has lost its  
481 virulence potential, in agreement with our previous observation that CLJ3 is sensitive to  
482 serum (Figure 3B) and less cytotoxic due to the loss of the ability to secrete Exolysin (16).  
483 More than 40 insertion sites of ISL3 have been detected in the genome of CLJ3, most  
484 within or upstream of genes encoding hypothetical proteins or putative regulators (Table  
485 S6) and some of them may have influenced fitness of the CLJ3 strain in the *Galleria* model  
486 of infection. Thus, we found that ISs have greatly contributed to pathogenicity of the CLJ1  
487 strain and to multi-drug resistance of CLJ3. As the coexistence of the two isolates in the  
488 patient lungs is possible, we can conclude that ISs have determined the global success  
489 of the CLJ lineage in establishing fatal infection.

490

## 491 **Discussion**

492 *P. aeruginosa* strains belonging to the group of taxonomic outliers are abundant in humid  
493 environments (18, 19, 90, 91) and are considered to be innocuous, based on a previous  
494 study (92). Here we present the results of a multiomics approach applied to two recent  
495 clinical isolates, CLJ1 and CLJ3, belonging to the same group of taxonomic outliers. This  
496 work gave insights into genome-wide modifications that provided bacteria with the

497 weapons for a successful colonization and dissemination in the human host. We found  
498 that the genomes of those strains are highly dynamic and evolved within the patient due  
499 to high number of ISs. Global traits necessary for pathogenicity and survival in the host,  
500 i.e. motility, adhesion and resistance to antimicrobials, are modulated by the CLJ-ISL3  
501 element. The later isolate CLJ3 acquired resistance toward antibiotics provided to the  
502 patients during hospitalization, with some ISs directly affecting components playing a role  
503 in resistance. Compared to the early colonizer CLJ1, the CLJ3 strain also displays higher  
504 intracellular levels of c-di-GMP, higher expression of the biofilm-associated adhesion  
505 protein CdrA, and has lost part of the LPS by the deletion of the *galU* gene; these are all  
506 features of adaptation to the so-called “chronic” lifestyle. Moreover, using bioinformatics  
507 screens we found 35 additional IS elements in the CLJ3 genome and these very likely  
508 contribute to other phenotypical changes not assessed in this study. In addition to  
509 previously known virulence determinants, numerous differentially expressed genes were  
510 annotated as “hypothetical” by using automated annotation technology RAST and their  
511 contribution in *P. aeruginosa* adaptation to human host should be further explored.

512 Although the exact origin of the ISL3 in the CLJ lineage is unknown, we can speculate on  
513 its acquisition from an environmental bacterial species present in the common microbial  
514 community. Indeed, the GC content of the CLJ1-ISL3 is 54.8%, while the rest of the *P.*  
515 *aeruginosa* genome is 66.6%, suggesting recent acquisition by a horizontal transfer. The  
516 initial disruption of the genes encoding flagellar components and pili may have allowed  
517 the CLJ strain to overcome the human immune defenses. Increased capacity to secrete  
518 the pore-forming toxin Exolysin gave the strain additional advantage to further damage  
519 the host epithelium and endothelium tissues and disseminate.

520 Previous studies indicated that the contribution of ISs to the adaptation of *P. aeruginosa*  
521 to CF environment is low with limited transposition events during chronic infection (93),  
522 which is in contrast to what was found in *in vitro* evolution experiment in *Escherichia coli*  
523 (94, 95). Search in the Pseudomonas data base (27) with the nucleotide sequence of the  
524 CLJ1-ISL3 fragment revealed altogether 12 strains with 100% identical fragments; 8 from  
525 Copenhagen University Hospital (96) and the others isolated from tertiary care hospital's  
526 intensive care units in Seattle (97). The exact positions of the ISL3 element in those  
527 genomes and phenotypes related to disrupted gene(s) are currently unknown, but this  
528 knowledge would give insights on whether and how the ISL3 participated in colonization  
529 process and adaptation of those strains to a particular infectious niche. More recent  
530 genomic characterization of environmental *P. aeruginosa* isolates from dental unit  
531 waterlines, showed that in addition of the OSA loci, the ISPa11 fragment altered genes  
532 of two master regulators, LasR and GacS, supporting the idea of ecological adaptive  
533 potential of *P. aeruginosa* by mobile elements (48). Therefore, in addition to small  
534 nucleotide changes in pathoadaptive genes, mobile genetic elements drive the  
535 emergence of phenotypic traits leading to adaptation of *P. aeruginosa* to niche the  
536 bacteria encounter and undoubtedly take part in strain-specific pathogenicity. The  
537 contribution of ISs to the increase of the bacterial pathogenic arsenal is likely  
538 underestimated due to still limited availability of closed bacterial genomes. New DNA  
539 sequencing technologies accessing genome fragments of tens and even hundreds of kb  
540 should reveal the global impact of mobile elements in bacterial evolution.

541

542



543 **Author's contributions**

544 ES performed all presented bioinformatics analyses of the data. PB, AB, GB, YC and AA  
545 performed experiments. SL provided materials. SE and IA designed the research and  
546 performed experiments. YC, SE and IA analyzed the data. SE and IA wrote the  
547 manuscript. All authors participated in preparing figures and tables and revised the final  
548 version of the manuscript.

549

550 **Acknowledgements**

551 The authors thank Maria Guillermina Casabona for initial proteomic experiments on CLJ  
552 strains and Yves Vandembrouck (CEA, Grenoble), Frédéric Boyer (UGA, Grenoble) and  
553 François Lebreton (HMS, Boston) for advice on genome analysis. Special thanks go to  
554 Mylène Robert-Genthon and Florian Chenavier for performing RT-qPCRs and PCRs and  
555 to Peter Panchev for carrying out *Galleria* infections. We are grateful to Tim Tolker-  
556 Nielsen for the generous gift of pUCP22-p*CdrA-gfp*(ASV)<sup>c</sup> plasmid.

557 This work was supported by grants from Agence Nationale de la Recherche (ANR-15-  
558 CE11-0018-01), the Laboratory of Excellence GRAL (ANR-10-LABX-49-01) and the  
559 Fondation pour la Recherche Médicale (Team FRM 2017, DEQ20170336705). Proteomic  
560 experiments were partly supported by the Proteomics French Infrastructure (ANR-10-  
561 INBS-08-01 grant). We further acknowledge support from CNRS, INSERM, CEA, and  
562 University Grenoble Alpes. Work in SL's laboratory was supported by a grant from the  
563 Cystic Fibrosis Foundation. AB received a Ph.D. fellowship from the CEA Irtelis program.

564 The funding bodies have no roles in the design of the study and collection, analysis, and  
565 interpretation of data and in writing the manuscript.

566

567 **Supplementary information is available at the journal's website**

568 **Competing Interests: The authors declare no competing financial interests**

569

## 570 **References**

571 1. Jones KE, Patel NG, Levy MA, Storeygard A, Balk D, Gittleman JL, et al. Global  
572 trends in emerging infectious diseases. *Nature*. 2008 Feb 21;451(7181):990-3.

573 2. Bartoli C, Roux F, Lamichhane JR. Molecular mechanisms underlying the  
574 emergence of bacterial pathogens: an ecological perspective. *Molecular plant pathology*.  
575 2016 Feb;17(2):303-10.

576 3. Diard M, Hardt WD. Evolution of bacterial virulence. *FEMS microbiology reviews*.  
577 2017 Sep 1;41(5):679-97.

578 4. Aujoulat F, Roger F, Bourdier A, Lotthe A, Lamy B, Marchandin H, et al. From  
579 environment to man: genome evolution and adaptation of human opportunistic bacterial  
580 pathogens. *Genes*. 2012 Mar 26;3(2):191-232.

581 5. Silby MW, Winstanley C, Godfrey SA, Levy SB, Jackson RW. *Pseudomonas*  
582 genomes: diverse and adaptable. *FEMS microbiology reviews*. 2011 Jul;35(4):652-80.

583 6. Xin XF, Kvitko B, He SY. *Pseudomonas syringae*: what it takes to be a pathogen.  
584 *Nature reviews Microbiology*. 2018 Feb 26.

- 585 7. Cullen L, McClean S. Bacterial Adaptation during Chronic Respiratory Infections.  
586 Pathogens. 2015 Mar 02;4(1):66-89.
- 587 8. Folkesson A, Jelsbak L, Yang L, Johansen HK, Ciofu O, Hoiby N, et al. Adaptation  
588 of *Pseudomonas aeruginosa* to the cystic fibrosis airway: an evolutionary perspective.  
589 Nature reviews Microbiology. 2012 Dec;10(12):841-51.
- 590 9. Hilliam Y, Moore MP, Lamont IL, Bilton D, Haworth CS, Foweraker J, et al.  
591 *Pseudomonas aeruginosa* adaptation and diversification in the non-cystic fibrosis  
592 bronchiectasis lung. The European respiratory journal. 2017 Apr;49(4).
- 593 10. Marvig RL, Damkiaer S, Khademi SM, Markussen TM, Molin S, Jelsbak L. Within-  
594 host evolution of *Pseudomonas aeruginosa* reveals adaptation toward iron acquisition  
595 from hemoglobin. mBio. 2014 May 6;5(3):e00966-14.
- 596 11. Marvig RL, Johansen HK, Molin S, Jelsbak L. Genome analysis of a transmissible  
597 lineage of *pseudomonas aeruginosa* reveals pathoadaptive mutations and distinct  
598 evolutionary paths of hypermutators. PLoS genetics. 2013;9(9):e1003741.
- 599 12. Smith EE, Buckley DG, Wu Z, Saenphimmachak C, Hoffman LR, D'Argenio DA, et  
600 al. Genetic adaptation by *Pseudomonas aeruginosa* to the airways of cystic fibrosis  
601 patients. Proceedings of the National Academy of Sciences of the United States of  
602 America. 2006 May 30;103(22):8487-92.
- 603 13. Kos VN, Deraspe M, McLaughlin RE, Whiteaker JD, Roy PH, Alm RA, et al. The  
604 resistome of *Pseudomonas aeruginosa* in relationship to phenotypic susceptibility.  
605 Antimicrobial agents and chemotherapy. 2015 Jan;59(1):427-36.
- 606 14. Thrane SW, Taylor VL, Freschi L, Kukavica-Ibrulj I, Boyle B, Laroche J, et al. The  
607 Widespread Multidrug-Resistant Serotype O12 *Pseudomonas aeruginosa* Clone

- 608 Emerged through Concomitant Horizontal Transfer of Serotype Antigen and Antibiotic  
609 Resistance Gene Clusters. *mBio*. 2015 Sep 22;6(5):e01396-15.
- 610 15. Hauser AR. The type III secretion system of *Pseudomonas aeruginosa*: infection  
611 by injection. *Nature reviews Microbiology*. 2009 Sep;7(9):654-65.
- 612 16. Elsen S, Huber P, Bouillot S, Coute Y, Fournier P, Dubois Y, et al. A type III  
613 secretion negative clinical strain of *Pseudomonas aeruginosa* employs a two-partner  
614 secreted exolysin to induce hemorrhagic pneumonia. *Cell host & microbe*. 2014 Feb  
615 12;15(2):164-76.
- 616 17. Roy PH, Tetu SG, Larouche A, Elbourne L, Tremblay S, Ren Q, et al. Complete  
617 genome sequence of the multiresistant taxonomic outlier *Pseudomonas aeruginosa* PA7.  
618 *PloS one*. 2010 Jan 22;5(1):e8842.
- 619 18. Selezska K, Kazmierczak M, Musken M, Garbe J, Schobert M, Haussler S, et al.  
620 *Pseudomonas aeruginosa* population structure revisited under environmental focus:  
621 impact of water quality and phage pressure. *Environmental microbiology*. 2012  
622 Aug;14(8):1952-67.
- 623 19. Wiehlmann L, Cramer N, Tummler B. Habitat-associated skew of clone abundance  
624 in the *Pseudomonas aeruginosa* population. *Environmental microbiology reports*. 2015  
625 Dec;7(6):955-60.
- 626 20. Huber P, Basso P, Reboud E, Attree I. *Pseudomonas aeruginosa* renews its  
627 virulence factors. *Environmental microbiology reports*. 2016 Jul 18.
- 628 21. Reboud E, Basso P, Maillard AP, Huber P, Attree I. Exolysin Shapes the Virulence  
629 of *Pseudomonas aeruginosa* Clonal Outliers. *Toxins*. 2017 Nov 9;9(11).

- 630 22. Reboud E, Elsen S, Bouillot S, Golovkine G, Basso P, Jeannot K, et al. Phenotype  
631 and toxicity of the recently discovered exlA-positive *Pseudomonas aeruginosa* strains  
632 collected worldwide. *Environmental microbiology*. 2016 Oct;18(10):3425-39.
- 633 23. Basso P, Wallet P, Elsen S, Soleilhac E, Henry T, Faudry E, et al. Multiple  
634 *Pseudomonas* species secrete exolysin-like toxins and provoke Caspase-1-dependent  
635 macrophage death. *Environmental microbiology*. 2017 Oct;19(10):4045-64.
- 636 24. Bouillot S, Munro P, Gallet B, Reboud E, Cretin F, Golovkine G, et al.  
637 *Pseudomonas aeruginosa* Exolysin promotes bacterial growth in lungs, alveolar damage  
638 and bacterial dissemination. *Scientific reports*. 2017 May 18;7(1):2120.
- 639 25. Choi KH, Kumar A, Schweizer HP. A 10-min method for preparation of highly  
640 electrocompetent *Pseudomonas aeruginosa* cells: application for DNA fragment transfer  
641 between chromosomes and plasmid transformation. *Journal of microbiological methods*.  
642 2006 Mar;64(3):391-7.
- 643 26. Aziz RK, Bartels D, Best AA, DeJongh M, Disz T, Edwards RA, et al. The RAST  
644 Server: rapid annotations using subsystems technology. *BMC genomics*. 2008 Feb  
645 8;9:75.
- 646 27. Winsor GL, Griffiths EJ, Lo R, Dhillon BK, Shay JA, Brinkman FS. Enhanced  
647 annotations and features for comparing thousands of *Pseudomonas* genomes in the  
648 *Pseudomonas* genome database. *Nucleic acids research*. 2016 Jan 4;44(D1):D646-53.
- 649 28. Krzywinski M, Schein J, Birol I, Connors J, Gascoyne R, Horsman D, et al. Circos:  
650 an information aesthetic for comparative genomics. *Genome research*. 2009  
651 Sep;19(9):1639-45.

- 652 29. Li H. Aligning sequence reads, clone sequences and assembly contigs with BWA-  
653 MEM. arXiv. 2013:1303.3997.
- 654 30. Han K, Tjaden B, Lory S. GRIL-seq provides a method for identifying direct targets  
655 of bacterial small regulatory RNA by in vivo proximity ligation. *Nature microbiology*. 2016  
656 Dec 22;2:16239.
- 657 31. Casabona MG, Vandenbrouck Y, Attree I, Coute Y. Proteomic characterization of  
658 *Pseudomonas aeruginosa* PAO1 inner membrane. *Proteomics*. 2013 Aug;13(16):2419-  
659 23.
- 660 32. Wieczorek S, Combes F, Lazar C, Gai Gianetto Q, Gatto L, Dorffer A, et al.  
661 DAPAR & ProStaR: software to perform statistical analyses in quantitative discovery  
662 proteomics. *Bioinformatics*. 2017 Jan 1;33(1):135-6.
- 663 33. Vizcaino JA, Csordas A, del-Toro N, Dianas JA, Griss J, Lavidas I, et al. 2016  
664 update of the PRIDE database and its related tools. *Nucleic acids research*. 2016 Jan  
665 4;44(D1):D447-56.
- 666 34. Rybtke MT, Borlee BR, Murakami K, Irie Y, Hentzer M, Nielsen TE, et al.  
667 Fluorescence-based reporter for gauging cyclic di-GMP levels in *Pseudomonas*  
668 *aeruginosa*. *Applied and environmental microbiology*. 2012 Aug;78(15):5060-9.
- 669 35. Zlosnik JE, Gunaratnam LC, Speert DP. Serum susceptibility in clinical isolates of  
670 *Burkholderia cepacia* complex bacteria: development of a growth-based assay for high  
671 throughput determination. *Frontiers in cellular and infection microbiology*. 2012;2:67.
- 672 36. Berry A, Han K, Trouillon J, Robert-Genthon M, Ragno M, Lory S, et al. cAMP and  
673 Vfr Control Exolysin Expression and Cytotoxicity of *Pseudomonas aeruginosa* Taxonomic  
674 Outliers. *Journal of bacteriology*. 2018 Jun 15;200(12).

- 675 37. Mathee K, Narasimhan G, Valdes C, Qiu X, Matewish JM, Koehrsen M, et al.  
676 Dynamics of *Pseudomonas aeruginosa* genome evolution. Proceedings of the National  
677 Academy of Sciences of the United States of America. 2008 Feb 26;105(8):3100-5.
- 678 38. Kung VL, Ozer EA, Hauser AR. The accessory genome of *Pseudomonas*  
679 *aeruginosa*. Microbiology and molecular biology reviews : MMBR. 2010 Dec;74(4):621-  
680 41.
- 681 39. Klockgether J, Cramer N, Wiehlmann L, Davenport CF, Tummler B. *Pseudomonas*  
682 *aeruginosa* Genomic Structure and Diversity. Frontiers in microbiology. 2011;2:150.
- 683 40. Kus JV, Tullis E, Cvitkovitch DG, Burrows LL. Significant differences in type IV pilin  
684 allele distribution among *Pseudomonas aeruginosa* isolates from cystic fibrosis (CF)  
685 versus non-CF patients. Microbiology. 2004 May;150(Pt 5):1315-26.
- 686 41. Smith DJ, Park J, Tiedje JM, Mohn WW. A large gene cluster in *Burkholderia*  
687 *xenovorans* encoding abietane diterpenoid catabolism. Journal of bacteriology. 2007  
688 Sep;189(17):6195-204.
- 689 42. Sana TG, Berni B, Bleves S. The T6SSs of *Pseudomonas aeruginosa* Strain PAO1  
690 and Their Effectors: Beyond Bacterial-Cell Targeting. Frontiers in cellular and infection  
691 microbiology. 2016;6:61.
- 692 43. Giraud C, Bernard CS, Calderon V, Yang L, Filloux A, Molin S, et al. The PprA-  
693 PprB two-component system activates CupE, the first non-archetypal *Pseudomonas*  
694 *aeruginosa* chaperone-usher pathway system assembling fimbriae. Environmental  
695 microbiology. 2011 Mar;13(3):666-83.
- 696 44. Goris J, Konstantinidis KT, Klappenbach JA, Coenye T, Vandamme P, Tiedje JM.  
697 DNA-DNA hybridization values and their relationship to whole-genome sequence

- 698 similarities. *International journal of systematic and evolutionary microbiology*. 2007  
699 Jan;57(Pt 1):81-91.
- 700 45. Siguier P, Perochon J, Lestrade L, Mahillon J, Chandler M. ISfinder: the reference  
701 centre for bacterial insertion sequences. *Nucleic acids research*. 2006 Jan 1;34(Database  
702 issue):D32-6.
- 703 46. Marchler-Bauer A, Bo Y, Han L, He J, Lanczycki CJ, Lu S, et al. CDD/SPARCLE:  
704 functional classification of proteins via subfamily domain architectures. *Nucleic acids  
705 research*. 2017 Jan 4;45(D1):D200-D3.
- 706 47. Castro-Jaimes S, Salgado-Camargo AD, Grana-Miraglia L, Lozano L, Bocanegra-  
707 Ibarias P, Volkow-Fernandez P, et al. Complete Genome Sequence of a Multidrug-  
708 Resistant *Acinetobacter baumannii* Isolate Obtained from a Mexican Hospital (Sequence  
709 Type 422). *Genome announcements*. 2016 Jun 23;4(3).
- 710 48. Vincent AT, Freschi L, Jeukens J, Kukavica-Ibrulj I, Emond-Rheault JG, Leduc A,  
711 et al. Genomic characterisation of environmental *Pseudomonas aeruginosa* isolated from  
712 dental unit waterlines revealed the insertion sequence ISPa11 as a chaotropic element.  
713 *FEMS microbiology ecology*. 2017 Sep 1;93(9).
- 714 49. Siguier P, Gourgouyere E, Chandler M. Bacterial insertion sequences: their genomic  
715 impact and diversity. *FEMS microbiology reviews*. 2014 Sep;38(5):865-91.
- 716 50. Vandecraen J, Chandler M, Aertsen A, Van Houdt R. The impact of insertion  
717 sequences on bacterial genome plasticity and adaptability. *Critical reviews in  
718 microbiology*. 2017 Nov;43(6):709-30.
- 719 51. Martinez E, Perez JE, Marquez C, Vilacoba E, Centron D, Leal AL, et al. Emerging  
720 and existing mechanisms co-operate in generating diverse beta-lactam resistance



- 721 phenotypes in geographically dispersed and genetically disparate *Pseudomonas*  
722 *aeruginosa* strains. *J Glob Antimicrob Resist*. 2013 Sep;1(3):135-42.
- 723 52. Sun Q, Ba Z, Wu G, Wang W, Lin S, Yang H. Insertion sequence ISRP10  
724 inactivation of the *oprD* gene in imipenem-resistant *Pseudomonas aeruginosa* clinical  
725 isolates. *International journal of antimicrobial agents*. 2016 May;47(5):375-9.
- 726 53. Vassilara F, Galani I, Souli M, Papanikolaou K, Giamarellou H, Papadopoulos A.  
727 Mechanisms responsible for imipenem resistance among *Pseudomonas aeruginosa*  
728 clinical isolates exposed to imipenem concentrations within the mutant selection window.  
729 *Diagnostic microbiology and infectious disease*. 2017 Jul;88(3):276-81.
- 730 54. Wolkowicz T, Patzer JA, Kaminska W, Gierczynski R, Dzierzanowska D.  
731 Distribution of carbapenem resistance mechanisms in *Pseudomonas aeruginosa* isolates  
732 among hospitalised children in Poland: Characterisation of two novel insertion sequences  
733 disrupting the *oprD* gene. *J Glob Antimicrob Resist*. 2016 Dec;7:119-25.
- 734 55. Lindberg F, Lindquist S, Normark S. Inactivation of the *ampD* gene causes  
735 semiconstitutive overproduction of the inducible *Citrobacter freundii* beta-lactamase.  
736 *Journal of bacteriology*. 1987 May;169(5):1923-8.
- 737 56. Perez-Gallego M, Torrens G, Castillo-Vera J, Moya B, Zamorano L, Cabot G, et  
738 al. Impact of AmpC Derepression on Fitness and Virulence: the Mechanism or the  
739 Pathway? *mBio*. 2016 Oct 25;7(5).
- 740 57. Lee M, Artola-Recolons C, Carrasco-Lopez C, Martinez-Caballero S, Heseck D,  
741 Spink E, et al. Cell-wall remodeling by the zinc-protease AmpDh3 from *Pseudomonas*  
742 *aeruginosa*. *Journal of the American Chemical Society*. 2013 Aug 28;135(34):12604-7.

- 743 58. Vollmer W, von Rechenberg M, Holtje JV. Demonstration of molecular interactions  
744 between the murein polymerase PBP1B, the lytic transglycosylase MltA, and the  
745 scaffolding protein MipA of *Escherichia coli*. *The Journal of biological chemistry*. 1999  
746 Mar 5;274(10):6726-34.
- 747 59. Li XZ, Plesiat P, Nikaido H. The challenge of efflux-mediated antibiotic resistance  
748 in Gram-negative bacteria. *Clinical microbiology reviews*. 2015 Apr;28(2):337-418.
- 749 60. Shah P, Swiatlo E. A multifaceted role for polyamines in bacterial pathogens.  
750 *Molecular microbiology*. 2008 Apr;68(1):4-16.
- 751 61. Lam JS, Taylor VL, Islam ST, Hao Y, Kocincova D. Genetic and Functional  
752 Diversity of *Pseudomonas aeruginosa* Lipopolysaccharide. *Frontiers in microbiology*.  
753 2011;2:118.
- 754 62. Raymond CK, Sims EH, Kas A, Spencer DH, Kuttyavin TV, Ivey RG, et al. Genetic  
755 variation at the O-antigen biosynthetic locus in *Pseudomonas aeruginosa*. *Journal of*  
756 *bacteriology*. 2002 Jul;184(13):3614-22.
- 757 63. Dean CR, Goldberg JB. *Pseudomonas aeruginosa* galU is required for a complete  
758 lipopolysaccharide core and repairs a secondary mutation in a PA103 (serogroup O11)  
759 wbpM mutant. *FEMS microbiology letters*. 2002 May 07;210(2):277-83.
- 760 64. Priebe GP, Dean CR, Zaidi T, Meluleni GJ, Coleman FT, Coutinho YS, et al. The  
761 galU Gene of *Pseudomonas aeruginosa* is required for corneal infection and efficient  
762 systemic spread following pneumonia but not for infection confined to the lung. *Infection*  
763 and immunity. 2004 Jul;72(7):4224-32.

- 764 65. Cabot G, Zamorano L, Moya B, Juan C, Navas A, Blazquez J, et al. Evolution of  
765 *Pseudomonas aeruginosa* Antimicrobial Resistance and Fitness under Low and High  
766 Mutation Rates. *Antimicrobial agents and chemotherapy*. 2016 Jan 4;60(3):1767-78.
- 767 66. Arora SK, Bangera M, Lory S, Ramphal R. A genomic island in *Pseudomonas*  
768 *aeruginosa* carries the determinants of flagellin glycosylation. *Proceedings of the National*  
769 *Academy of Sciences of the United States of America*. 2001 Jul 31;98(16):9342-7.
- 770 67. Ince D, Sutterwala FS, Yahr TL. Secretion of Flagellar Proteins by the  
771 *Pseudomonas aeruginosa* Type III Secretion-Injectisome System. *Journal of*  
772 *bacteriology*. 2015 Jun 15;197(12):2003-11.
- 773 68. Feuillet V, Medjane S, Mondor I, Demaria O, Pagni PP, Galan JE, et al.  
774 Involvement of Toll-like receptor 5 in the recognition of flagellated bacteria. *Proceedings*  
775 *of the National Academy of Sciences of the United States of America*. 2006 Aug  
776 15;103(33):12487-92.
- 777 69. Tammam S, Sampaleanu LM, Koo J, Manoharan K, Daubaras M, Burrows LL, et  
778 al. PilMNOPQ from the *Pseudomonas aeruginosa* type IV pilus system form a  
779 transenvelope protein interaction network that interacts with PilA. *Journal of bacteriology*.  
780 2013 May;195(10):2126-35.
- 781 70. Basso P, Ragno M, Elsen S, Reboud E, Golovkine G, Bouillot S, et al.  
782 *Pseudomonas aeruginosa* Pore-Forming Exolysin and Type IV Pili Cooperate To Induce  
783 Host Cell Lysis. *mBio*. 2017 Jan 24;8(1).
- 784 71. Borlee BR, Goldman AD, Murakami K, Samudrala R, Wozniak DJ, Parsek MR.  
785 *Pseudomonas aeruginosa* uses a cyclic-di-GMP-regulated adhesin to reinforce the  
786 biofilm extracellular matrix. *Molecular microbiology*. 2010 Feb;75(4):827-42.

- 787 72. Faure LM, Garvis S, de Bentzmann S, Bigot S. Characterization of a novel two-  
788 partner secretion system implicated in the virulence of *Pseudomonas aeruginosa*.  
789 *Microbiology*. 2014 Sep;160(Pt 9):1940-52.
- 790 73. Kida Y, Higashimoto Y, Inoue H, Shimizu T, Kuwano K. A novel secreted protease  
791 from *Pseudomonas aeruginosa* activates NF-kappaB through protease-activated  
792 receptors. *Cellular microbiology*. 2008 Jul;10(7):1491-504.
- 793 74. Melvin JA, Gaston JR, Phillips SN, Springer MJ, Marshall CW, Shanks RMQ, et al.  
794 *Pseudomonas aeruginosa* Contact-Dependent Growth Inhibition Plays Dual Role in Host-  
795 Pathogen Interactions. *mSphere*. 2017 Nov-Dec;2(6).
- 796 75. Mercy C, Ize B, Salcedo SP, de Bentzmann S, Bigot S. Functional Characterization  
797 of *Pseudomonas* Contact Dependent Growth Inhibition (CDI) Systems. *PLoS one*.  
798 2016;11(1):e0147435.
- 799 76. Blumer C, Haas D. Iron regulation of the *hcnABC* genes encoding hydrogen  
800 cyanide synthase depends on the anaerobic regulator ANR rather than on the global  
801 activator GacA in *Pseudomonas fluorescens* CHA0. *Microbiology*. 2000 Oct;146 ( Pt  
802 10):2417-24.
- 803 77. Carterson AJ, Morici LA, Jackson DW, Frisk A, Lizewski SE, Jupiter R, et al. The  
804 transcriptional regulator AlgR controls cyanide production in *Pseudomonas aeruginosa*.  
805 *Journal of bacteriology*. 2004 Oct;186(20):6837-44.
- 806 78. Carroll W, Lenney W, Wang T, Spanel P, Alcock A, Smith D. Detection of volatile  
807 compounds emitted by *Pseudomonas aeruginosa* using selected ion flow tube mass  
808 spectrometry. *Pediatric pulmonology*. 2005 May;39(5):452-6.

- 809 79. Ryall B, Davies JC, Wilson R, Shoemark A, Williams HD. *Pseudomonas*  
810 *aeruginosa*, cyanide accumulation and lung function in CF and non-CF bronchiectasis  
811 patients. *The European respiratory journal*. 2008 Sep;32(3):740-7.
- 812 80. Frangipani E, Perez-Martinez I, Williams HD, Cherbuin G, Haas D. A novel  
813 cyanide-inducible gene cluster helps protect *Pseudomonas aeruginosa* from cyanide.  
814 *Environmental microbiology reports*. 2014 Feb;6(1):28-34.
- 815 81. Hirai T, Osamura T, Ishii M, Arai H. Expression of multiple *cbb3* cytochrome c  
816 oxidase isoforms by combinations of multiple isosubunits in *Pseudomonas aeruginosa*.  
817 *Proceedings of the National Academy of Sciences of the United States of America*. 2016  
818 Oct 24.
- 819 82. Firoved AM, Ornatowski W, Deretic V. Microarray analysis reveals induction of  
820 lipoprotein genes in mucoid *Pseudomonas aeruginosa*: implications for inflammation in  
821 cystic fibrosis. *Infection and immunity*. 2004 Sep;72(9):5012-8.
- 822 83. Damron FH, Napper J, Teter MA, Yu HD. Lipotoxin F of *Pseudomonas aeruginosa*  
823 is an AlgU-dependent and alginate-independent outer membrane protein involved in  
824 resistance to oxidative stress and adhesion to A549 human lung epithelia. *Microbiology*.  
825 2009 Apr;155(Pt 4):1028-38.
- 826 84. Fortier LC, Sekulovic O. Importance of prophages to evolution and virulence of  
827 bacterial pathogens. *Virulence*. 2013 Jul 1;4(5):354-65.
- 828 85. Winstanley C, Langille MG, Fothergill JL, Kukavica-Ibrulj I, Paradis-Bleau C,  
829 Sanschagrín F, et al. Newly introduced genomic prophage islands are critical  
830 determinants of in vivo competitiveness in the Liverpool Epidemic Strain of *Pseudomonas*  
831 *aeruginosa*. *Genome research*. 2009 Jan;19(1):12-23.

- 832 86. Matsui H, Sano Y, Ishihara H, Shinomiya T. Regulation of pyocin genes in  
833 *Pseudomonas aeruginosa* by positive (prtN) and negative (prtR) regulatory genes.  
834 *Journal of bacteriology*. 1993 Mar;175(5):1257-63.
- 835 87. McFarland KA, Dolben EL, LeRoux M, Kambara TK, Ramsey KM, Kirkpatrick RL,  
836 et al. A self-lysis pathway that enhances the virulence of a pathogenic bacterium.  
837 *Proceedings of the National Academy of Sciences of the United States of America*. 2015  
838 Jul 7;112(27):8433-8.
- 839 88. Jatsenko T, Sidorenko J, Saumaa S, Kivisaar M. DNA Polymerases ImuC and  
840 DinB Are Involved in DNA Alkylation Damage Tolerance in *Pseudomonas aeruginosa* and  
841 *Pseudomonas putida*. *PloS one*. 2017;12(1):e0170719.
- 842 89. Oliver A, Canton R, Campo P, Baquero F, Blazquez J. High frequency of  
843 hypermutable *Pseudomonas aeruginosa* in cystic fibrosis lung infection. *Science*. 2000  
844 May 19;288(5469):1251-4.
- 845 90. Boukerb AM, Decor A, Ribun S, Tabaroni R, Rousset A, Commin L, et al. Genomic  
846 Rearrangements and Functional Diversification of lecA and lecB Lectin-Coding Regions  
847 Impacting the Efficacy of Glycomimetics Directed against *Pseudomonas aeruginosa*.  
848 *Frontiers in microbiology*. 2016;7:811.
- 849 91. Boukerb AM, Marti R, Cournoyer B. Genome Sequences of Three Strains of the  
850 *Pseudomonas aeruginosa* PA7 Clade. *Genome announcements*. 2015 Nov 19;3(6).
- 851 92. Hilker R, Munder A, Klockgether J, Losada PM, Chouvarine P, Cramer N, et al.  
852 Interclonal gradient of virulence in the *Pseudomonas aeruginosa* pangenome from  
853 disease and environment. *Environmental microbiology*. 2015 Jan;17(1):29-46.

- 854 93. Rau MH, Marvig RL, Ehrlich GD, Molin S, Jelsbak L. Deletion and acquisition of  
855 genomic content during early stage adaptation of *Pseudomonas aeruginosa* to a human  
856 host environment. *Environmental microbiology*. 2012 Aug;14(8):2200-11.
- 857 94. Gaffe J, McKenzie C, Maharjan RP, Coursange E, Ferenci T, Schneider D.  
858 Insertion sequence-driven evolution of *Escherichia coli* in chemostats. *Journal of*  
859 *molecular evolution*. 2011 Apr;72(4):398-412.
- 860 95. Raeside C, Gaffe J, Deatherage DE, Tenailon O, Briska AM, Ptashkin RN, et al.  
861 Large chromosomal rearrangements during a long-term evolution experiment with  
862 *Escherichia coli*. *mBio*. 2014 Sep 9;5(5):e01377-14.
- 863 96. Marvig RL, Sommer LM, Molin S, Johansen HK. Convergent evolution and  
864 adaptation of *Pseudomonas aeruginosa* within patients with cystic fibrosis. *Nature*  
865 *genetics*. 2015 Jan;47(1):57-64.
- 866 97. Roach DJ, Burton JN, Lee C, Stackhouse B, Butler-Wu SM, Cookson BT, et al. A  
867 Year of Infection in the Intensive Care Unit: Prospective Whole Genome Sequencing of  
868 Bacterial Clinical Isolates Reveals Cryptic Transmissions and Novel Microbiota. *PLoS*  
869 *genetics*. 2015 Jul;11(7):e1005413.
- 870
- 871
- 872
- 873
- 874
- 875

## 876 **Figure Legends**

877 **Fig. 1** Comparison of the CLJ1 and CLJ3 genome, transcriptome and proteome. The  
878 overview of the three genomes, including the reference genome of the PA7 strain, is  
879 shown on the left, while the image on the right is an enlarged genomic segment at the  
880 hcn locus with a more detailed description of the data. The red bar charts indicate that  
881 the gene or protein is more expressed in CLJ1, whereas the green bars show higher  
882 expression in CLJ3; darker tone indicates statistically significant expression difference  
883 between the two strains (False Discovery Rate < 0.05). The labels linked to the outmost  
884 ring show the genes that are differentially expressed in both, RNA-Seq and at least one  
885 of the proteomic datasets. The protein subcellular localization (outmost ring) is colored as  
886 in the Pseudomonas Genome Database (30). The CLJ-ISL3 insertions are indicated by  
887 red, green and blue triangles, depending on their presence in CLJ1, CLJ3 or both strains,  
888 respectively.

889

890 **Fig. 2** Insertions of CLJ-ISL3 into genes encoding determinants of antibiotic susceptibility.  
891 **A** Representation of the 2,985-bp CLJ-ISL3 IS with three genes and inverted repeats at  
892 its ends. **B** Representation of the *oprD* disruption in CLJ3 by the CLJ-ISL3 insertion  
893 sequence. **C** Location of CLJ-ISL3 in *ampD* in CLJ3. **D** Analysis of the relative expression  
894 of *ampDH3* and *mipA* in CLJ1 and CLJ3 strains by RT-qPCR. The bars indicate the  
895 standard error of the mean. **E** Gene organization of the region in PA7 and CLJ1 that is  
896 absent in CLJ3. CLJ-ISL3 is found in *puuP* in CLJ1 while, both *puuP* and *mexX* are  
897 disrupted in CLJ3, with the connecting sequence replaced by CLJ-ISL3 (see the text).



898 **Fig. 3** ISs within OSA loci and impact on serum sensitivity. **A** Comparison of the OSA  
899 region in PA7 and CLJ strains. CLJ-ISL3 is inserted in one location in CLJ1 and at two  
900 sites in CLJ3, while IS66 is present in two copies in CLJ3. Correspondence between non-  
901 annotated genes is depicted with connecting lines. **B** Kinetics of serum killing of CLJ1  
902 and CLJ3 strains. Bacteria were incubated with human sera for indicated time, diluted  
903 and spotted on agar plates. Colony forming units were counted after incubation at 37°C.

904

905 **Fig. 4** Modifications in components associated with surface appendices. **A** Gene  
906 organization of *flgL* region in PAO1 and the CLJ1 strain. Two CLJ-ISL3, interrupting *fgtA*  
907 and *flgL*, were found in the CLJ3 genome that probably recombined in CLJ1, leaving only  
908 one copy of the IS. **B** Representation of the *pilMNOPQ* operon. The CLJ-ISL3 in *pilM*  
909 gene was found in CLJ1 and CLJ3. **C** Synthesis of the adhesin CdrA is linked to high  
910 intracellular c-di-GMP levels. The c-di-GMP levels in CLJ1 and CLJ3 strains were  
911 monitored using the *pcdrA-gfp(ASV)c* plasmid. Fluorescence was measured every 15 min  
912 for 6 h of growth. The error-bars indicate the standard deviation.

913

914 **Fig. 5** Expression of virulence factors and pathogenicity. **A** The *hcn* operon in CLJ1 and  
915 insertion of CLJ-ISL3 within the *hcnB* gene in CLJ3. **B** Relative expression of *hcnB*  
916 measured by RT-qPCR and hydrogen cyanide production in indicated strains. **C** Analysis  
917 of the relative expression of *ccoG2*, *ccoN4*, *lptF*, and CLJ1\_1187 in CLJ1 and CLJ3  
918 strains by RT-qPCR. The bars indicate the standard error of the mean. **D** The *imuABC*  
919 operon and insertion of CLJ-ISL3. **E** Survival of *Galleria* following injection of different

920 strains. Twenty larvae were infected with 5-10 bacteria (estimated from CFU counts) and  
921 their survival was followed over indicated period by counting the dead ones. PBS was  
922 injected as mock control.

923

924

**Figure 1**

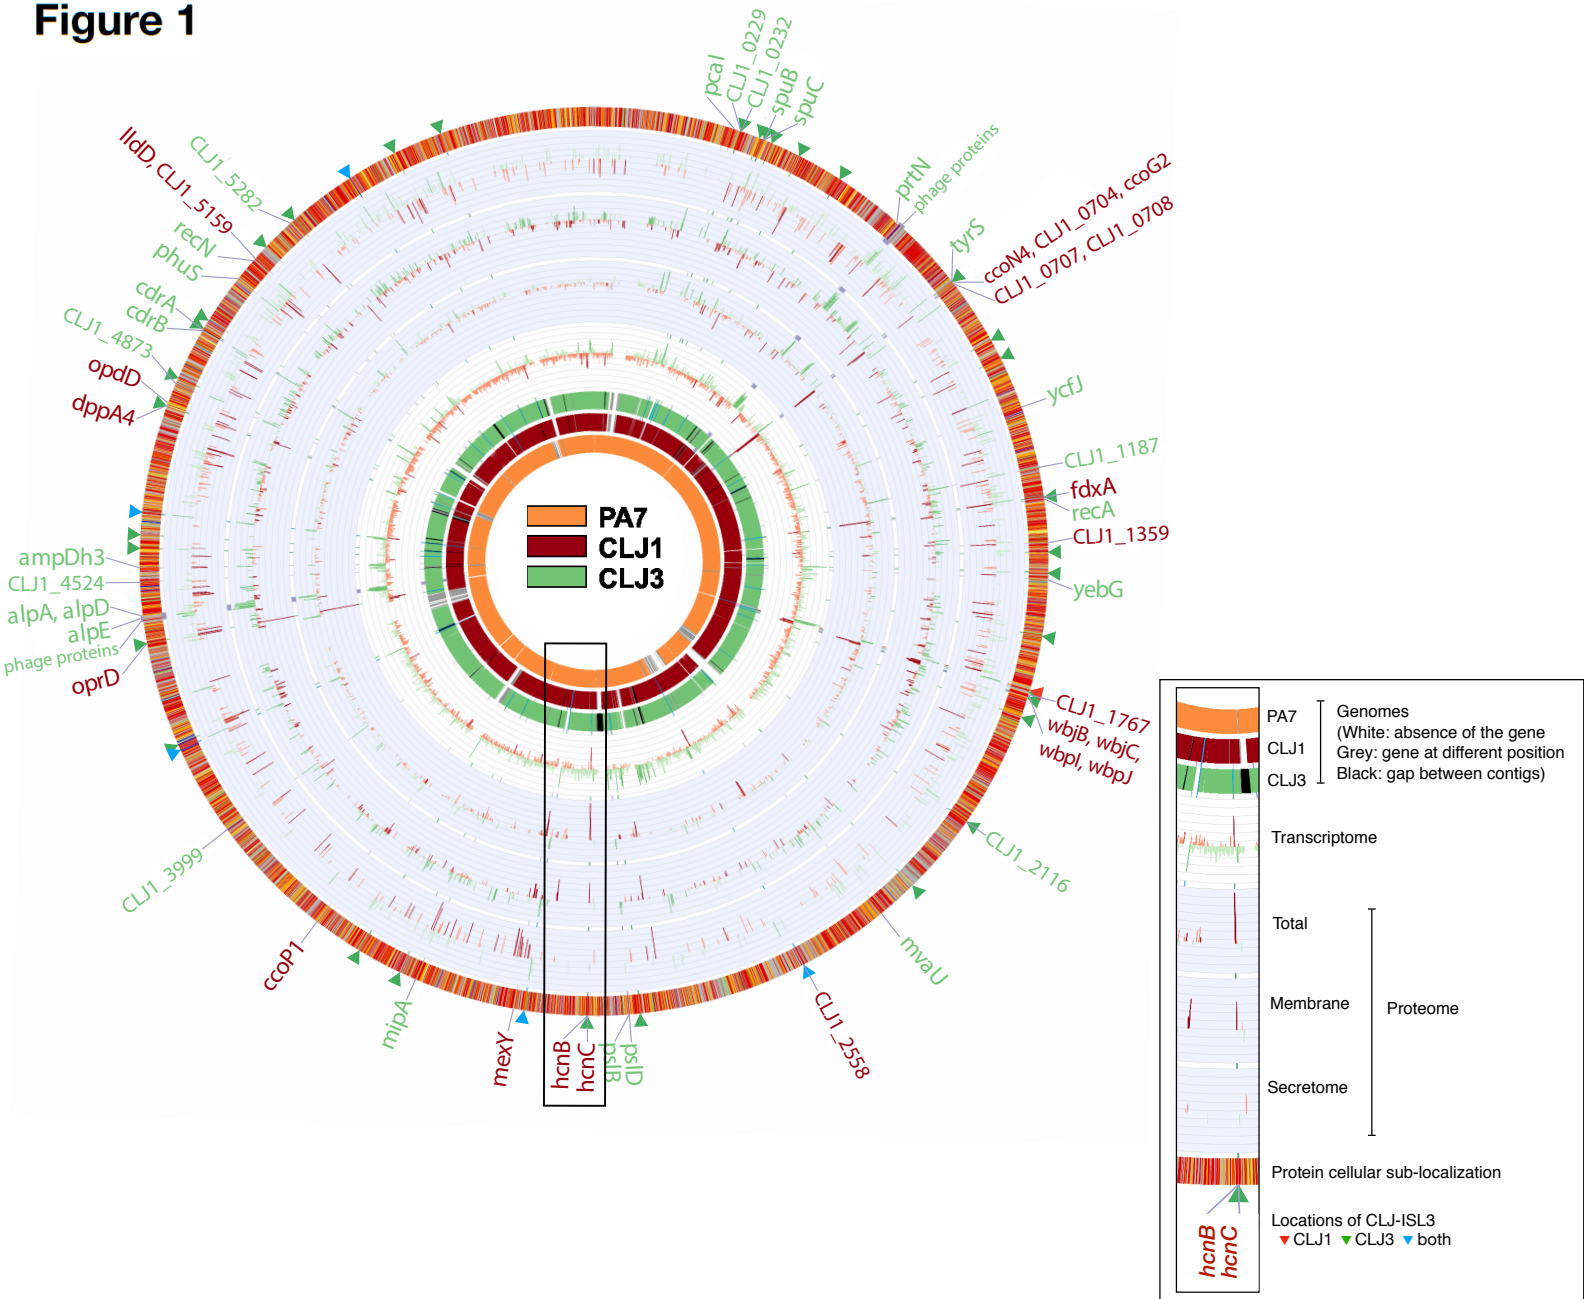

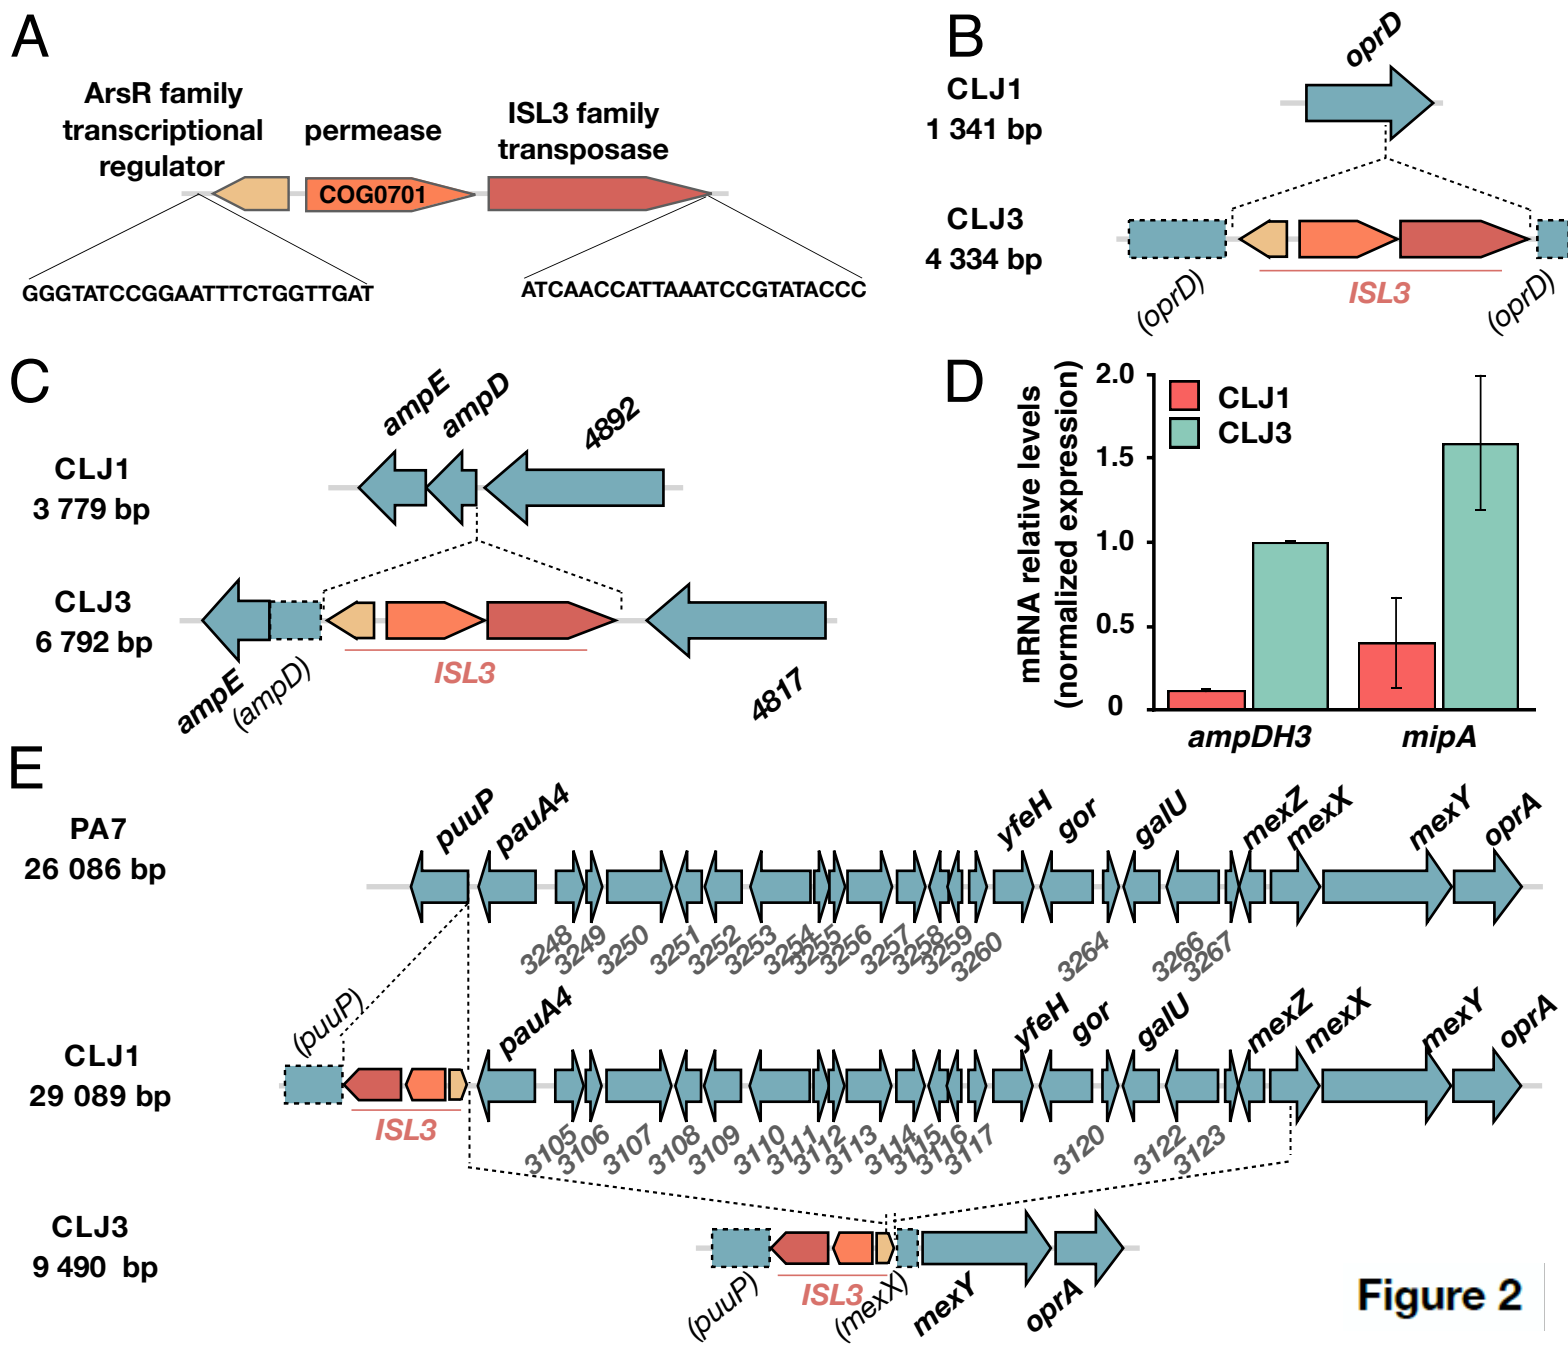

A

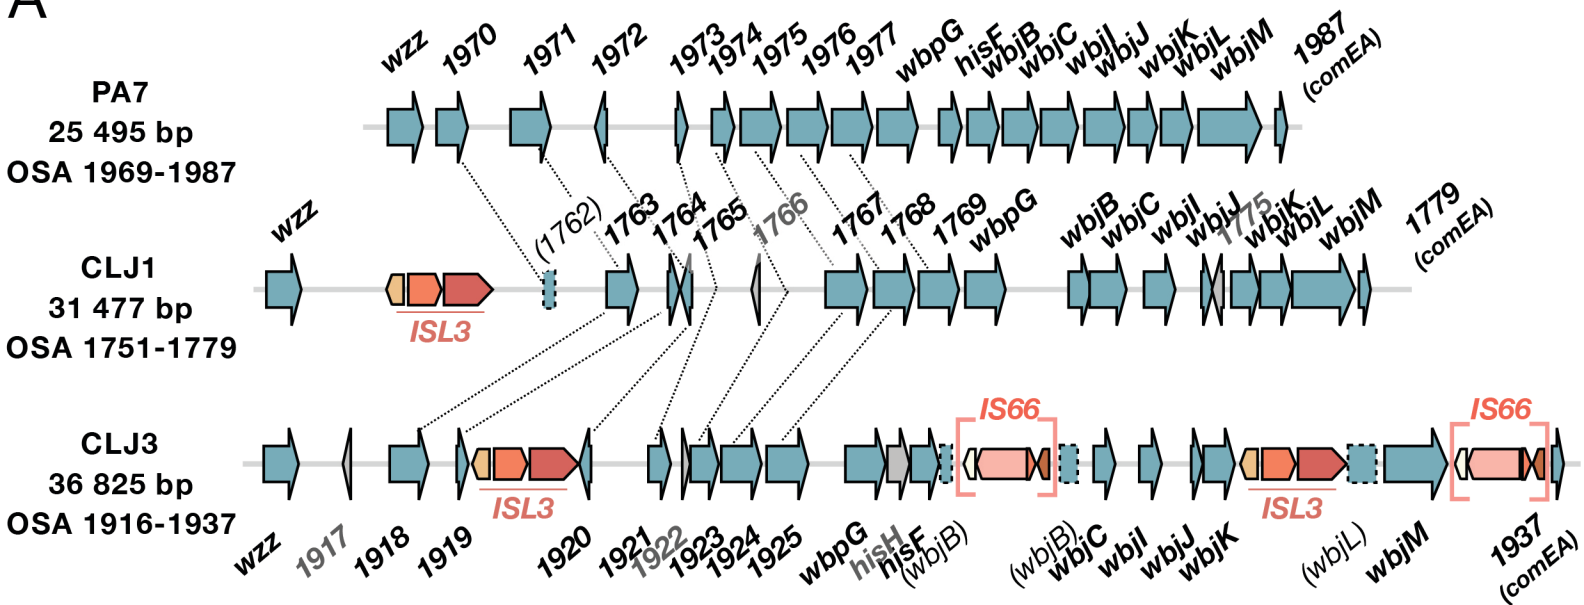

B

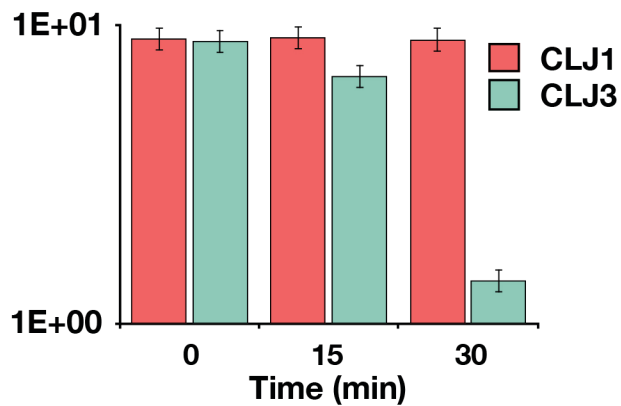

Figure 3

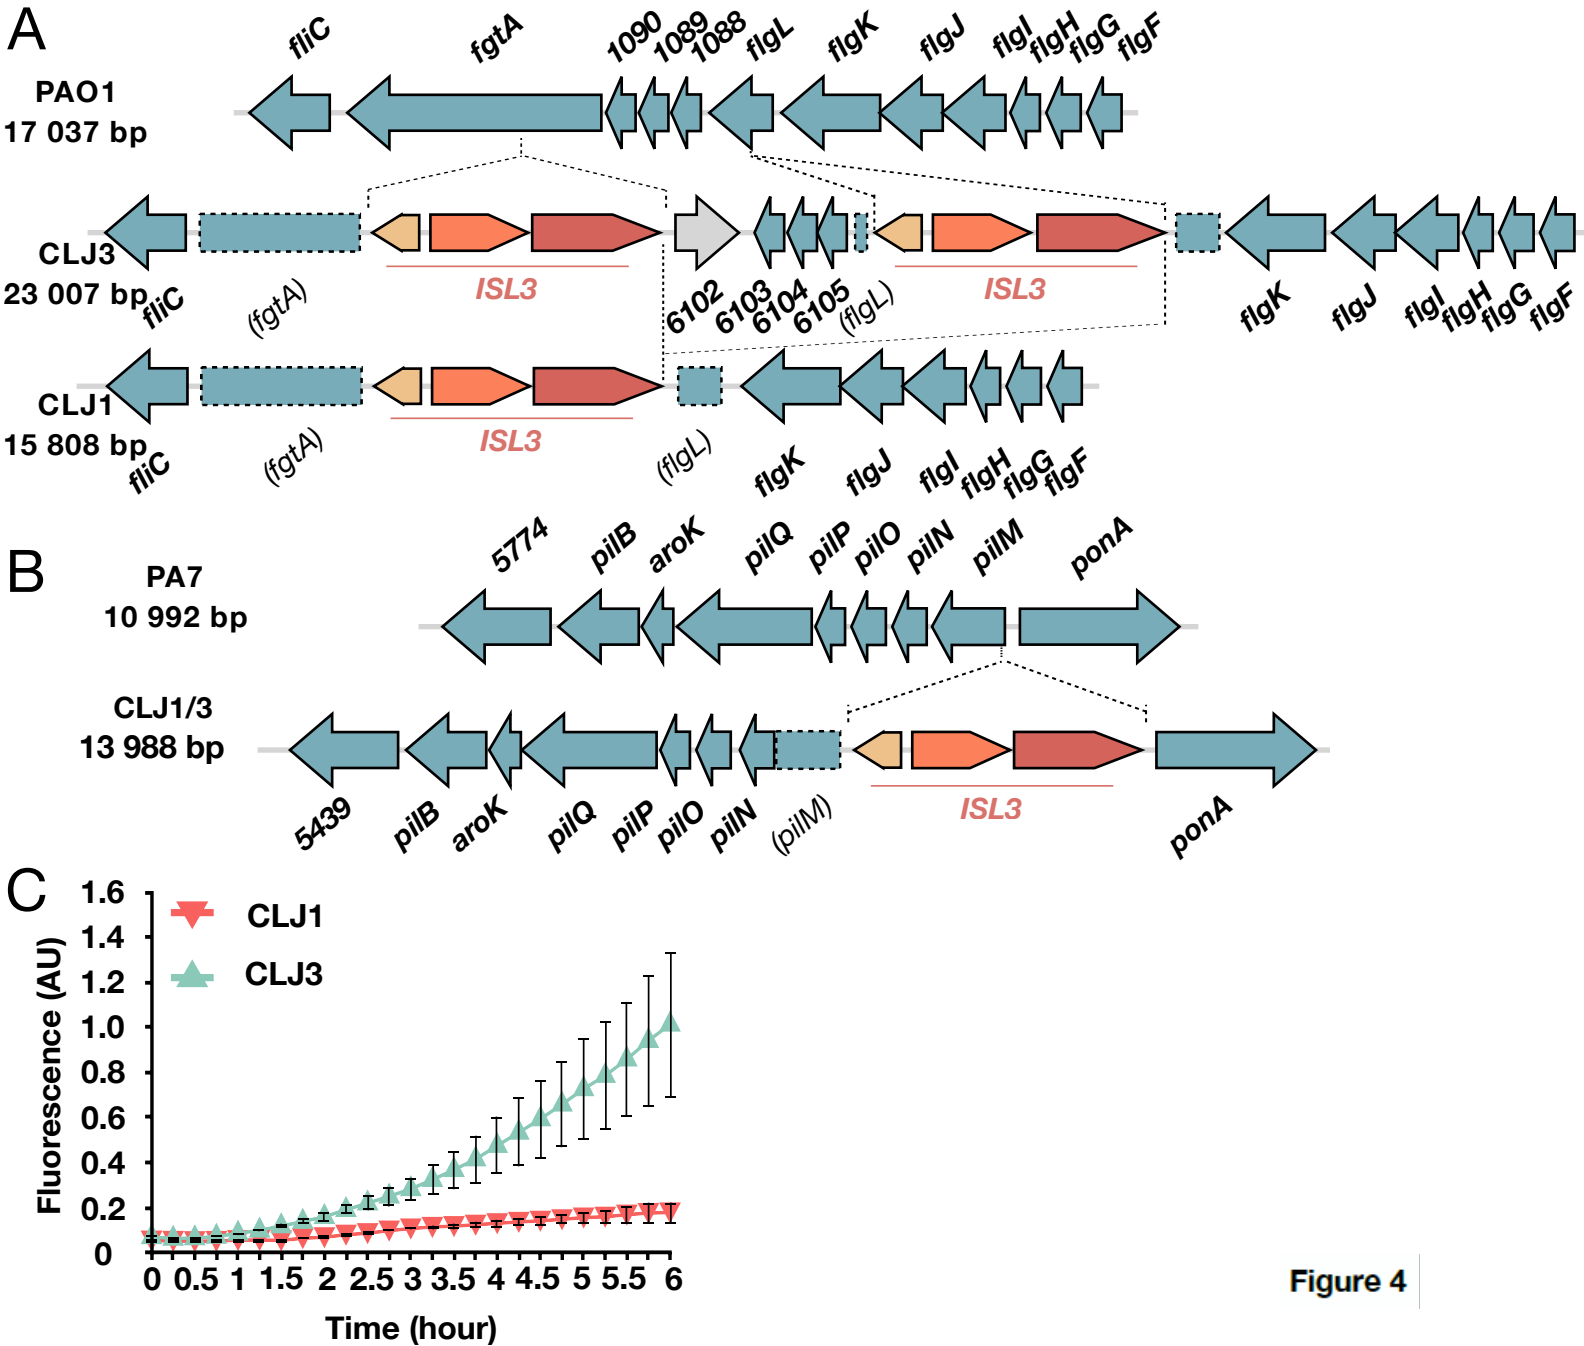

Figure 5

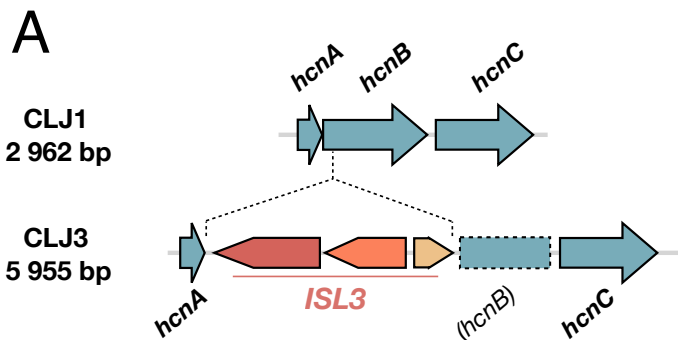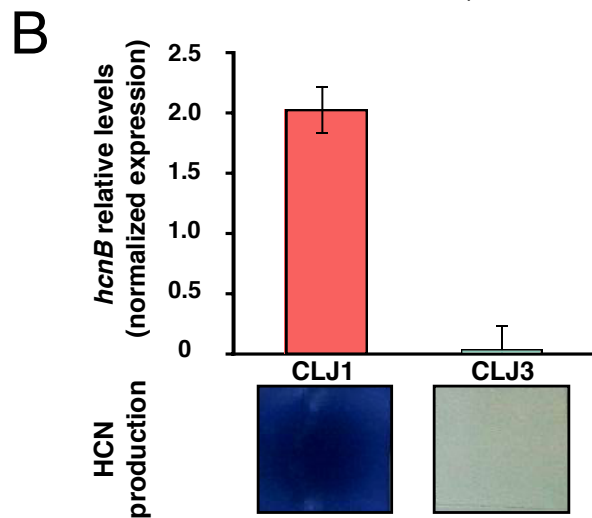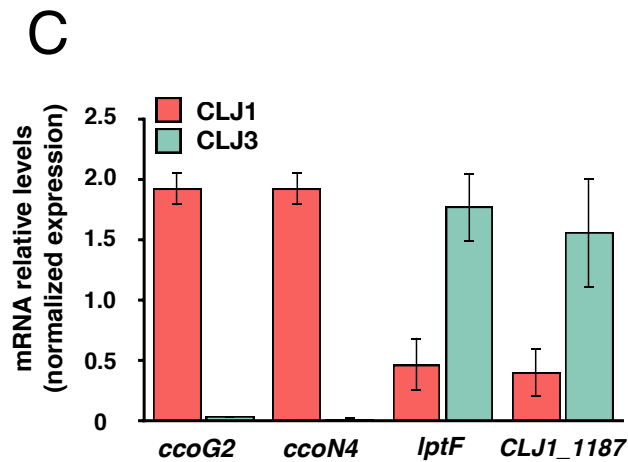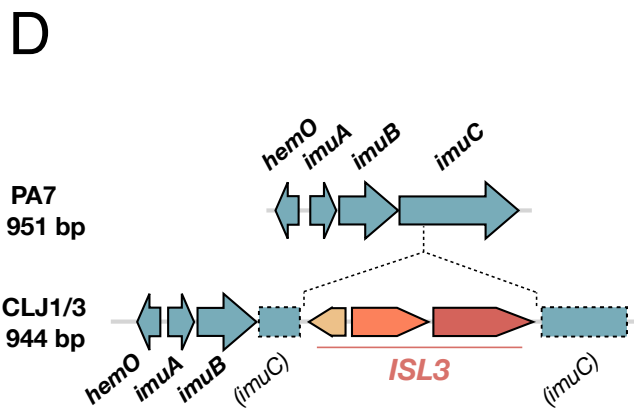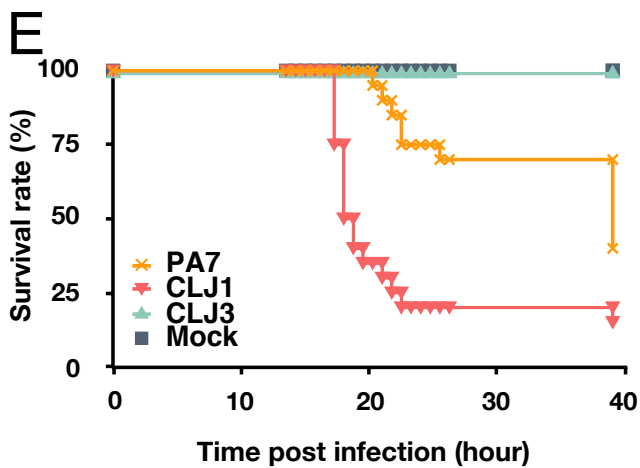

1  
2  
3  
4  
5  
6  
7  
8  
9  
10  
11  
12  
13  
14  
15  
16  
17

## Supporting Information

### Insertion sequences drive the emergence of a highly adapted human pathogen

Erwin Sentausa<sup>1#</sup>, Pauline Basso<sup>1+</sup>, Alice Berry<sup>1</sup>, Annie Adrait<sup>2</sup>, Gwendoline Bellement<sup>1,2∞</sup>, Yohann Couté<sup>2</sup>, Stephen Lory<sup>3</sup>, Sylvie Elsen<sup>1\*</sup> and Ina Attrée<sup>1\*</sup>

\*Corresponding authors: [ina.attree-delic@cea.fr](mailto:ina.attree-delic@cea.fr); [sylvie.elsen@cea.fr](mailto:sylvie.elsen@cea.fr).

#### The supplementary information includes:

Supplementary Materials and Methods

Supplementary References

Supplementary Figure S1

Supplementary Tables S1 to S10



## 18 **Supplementary Materials and Methods**

### 19 **Genome sequencing, assembly, annotation and comparison**

20 The DNA extracted from the CLJ1 bacteria was sequenced on Illumina HiSeq 2000  
21 systems at the Beijing Genomics Institute, China with a 2×50 base-pairs (bp) paired-end  
22 mode, generating 12,333,368 reads with a genome coverage of 90-100x. PacBio (Base  
23 Clear, Leiden, Netherlands) technology was also used, providing 114,707 reads. The  
24 Illumina reads were trimmed to remove low quality sequences (limit = 0.05) and  
25 ambiguous nucleotides (maximum two nucleotides allowed) and assembled *de novo*  
26 using CLC Genomics Workbench 9.0 (Qiagen, Aarhus, Denmark). The resulting contigs  
27 were then combined with the PacBio reads using the “Join Contigs” function of the CLC  
28 Genome Finishing Module version 1.6.1 (Qiagen). Contigs or scaffolds consisting of fewer  
29 than 100 reads were filtered out and BLAST (1) searches were performed to check and  
30 remove those that show no match to *Pseudomonas* sequence in GenBank (2). CLJ3  
31 genomic DNA was sequenced using Illumina MiSeq at the Biopolymers Facility, Harvard  
32 Medical School, Boston, USA, with 150-bp single-end runs, generating 2,495,173 reads.  
33 Quality trimming was done using CLC Genomics Workbench 9.0 using the same  
34 parameters as those used for CLJ1, followed by *de novo* assembly with minimal contig  
35 length of 1 kb. The order of both CLJ1 and CLJ3 scaffolds or contigs was determined  
36 based on the genome sequence of PA7 strain using the “move contigs” tool of the Mauve  
37 Genome Alignment Software version snapshot\_2015-02-13 (3). Average nucleotide  
38 identity between genomes were estimated using ANI calculator tool on the enveomics  
39 collection server (4) with minimum alignment length, identity, and number of 700 bp, 70%,  
40 and 50, respectively, using 1 000 bp window size and 200 bp step size. SNPs between

41 CLJ1 and CLJ3 genomes were detected by mapping trimmed CLJ3 reads to CLJ1  
42 genome in CLC Genomics Workbench 9.0, followed by using Basic Variant Detection  
43 1.71 tool in the Workbench with the following parameters: Ploidy = 1, Ignore positions  
44 with coverage above = 100 000, Restrict calling to target regions = Not set, Ignore broken  
45 pairs = Yes, Ignore non-specific matches = Reads, Minimum coverage = 10, Minimum  
46 count = 2, Minimum frequency (%) = 35.0, Base quality filter = Yes, Neighborhood radius  
47 = 5, Minimum central quality = 20, Minimum neighborhood quality = 15, Read direction  
48 filter = No, Relative read direction filter = Yes, Significance (%) = 1.0, Read position filter  
49 = No, Remove pyro-error variants = No. COG annotation was done using the WebMGA  
50 server (5) with E-value cutoff of 0.001. Subcellular localizations of PA7 proteins were  
51 retrieved from the Pseudomonas Genome Database, whereas those of CLJ1 and CLJ3  
52 were predicted using PSORTb version 3.0.2 (6) and LocTree3 (7). Orthologous genes  
53 among the strains were identified using OrthoMCL version 2.0.9 (8), with a BLASTp E-  
54 value cutoff of  $1 \times 10^{-5}$  and the default Markov cluster algorithm (MCL) inflation parameter  
55 of 1.5.

## 56 **Transcriptome analysis**

57 The preparations of the Illumina libraries and sequencing were done by standard  
58 procedures at the Biopolymer Facility, Harvard Medical School, Boston, USA. Illumina  
59 HiSeq was used for the sequencing with 50-bp single-end runs, generating 3,225,727  
60 and 21,633,018 reads for CLJ1 and 56,804,547 and 2,139,035 reads for CLJ3. For each  
61 replicate, raw RNA-Seq read trimmings were done in CLC Genomics Workbench 9.0  
62 using the same parameters as for genome sequencing reads, and the trimmed reads  
63 were mapped to the annotated CLJ1 genome using the RNA-Seq analysis tool. Total

64 number of reads mapped to the genes were incorporated into a tabular format and  
65 analyzed using the DESeq2 differential expression analysis pipeline (9). Differentially  
66 expressed genes between CLJ1 and CLJ3 were identified using a 5% False Discovery  
67 Rate (FDR).

## 68 **Proteomics**

69 Sample preparation. Overnight cultures of CLJ1 were diluted to an OD<sub>600</sub> 0.1 in 30 mL,  
70 CLJ3 was left a night at room temperature and then the cultures were incubated at 37°C  
71 under shaking to an OD<sub>600</sub> 0.8. At this point, 30 mL of bacterial cultures were centrifuged  
72 at 6,000 rpm, 4°C for 10 min, and supernatants were filtered with 0.22 µm filters. Total  
73 membranes separation. Pellets were re-suspended in 1 mL of 10 mM Tris-HCl, 20 %  
74 sucrose, pH8 buffer supplemented with protease inhibitors cocktail (PIC, Roche, Basel,  
75 Switzerland) and were disrupted by sonication. Unbroken bacteria were removed by a  
76 centrifugation at 8,000 rpm for 10 min at 4°C. Total membrane fraction was obtained by  
77 ultracentrifugation at 200,000 g for 1 h at 4°C, and the pelleted fraction was washed twice  
78 with 1 mL of 10 mM Tris-HCl, 20 mM MgCl<sub>2</sub>, pH8, supplemented with PIC, and re-  
79 suspended in 500 µL of the same buffer. Supernatant fraction. Proteins from supernatants  
80 were precipitated by a TCA-sarkosyl method (0.5% final volume of sarkosyl and 7.5%  
81 final volume of TCA) for 2 h on ice and centrifuged at 12,000 rpm for 15 min. Pellets were  
82 washed twice with tetrahydrofuran, and re-suspended in 50 µL of loading buffer. Prepared  
83 samples, in triplicates, were then analyzed by SDS-PAGE and immunoblotting using  
84 antibodies directed against 3 synthetic peptides of ExlA ((10), 1:1 000), anti-RpoA (1:5  
85 000) as control for whole cell, anti-TagQ ((11), 1:10 000) as control for the membrane  
86 fraction and anti-DsbA (1:2 000) as control for the periplasm fraction. Secondary

87 antibodies used were HRP-coupled anti-rabbit (1:50 000) and anti-mouse (1:5 000)  
88 (Sigma-Aldrich). Western blots were developed using Luminata Crescendo Western HRP  
89 (Millipore) substrate.

90 Mass spectrometry-based quantitative proteomic analyses. Extracted proteins were  
91 prepared as described in (12). Briefly, proteins were stacked in the top of a SDS-PAGE  
92 gel (NuPAGE 4-12%, ThermoFisher Scientific), stained with Coomassie blue (R250, Bio-  
93 Rad) before in-gel digestion using modified trypsin (Promega, sequencing grade).  
94 Resulting peptides were analysed by nanoliquid chromatography coupled to tandem  
95 mass spectrometry (Ultimate 3000 coupled to LTQ-Orbitrap Velos Pro, Thermo Scientific)  
96 using a 120-min gradient (2 analytical replicates per biological replicate). RAW files were  
97 processed using MaxQuant (13) version 1.5.3.30. The protein content in total, membrane,  
98 and secretome proteomes of CLJ1 and CLJ3 were analyzed independently from the  
99 others. Spectra were searched against the homemade CLJ database and the frequently  
100 observed contaminants database embedded in MaxQuant. Trypsin was chosen as the  
101 enzyme and 2 missed cleavages were allowed. Peptide modifications allowed during the  
102 search were: carbamidomethylation (C, fixed), acetyl (Protein N-ter, variable) and  
103 oxidation (M, variable). Minimum peptide length was set to 7 amino acids. Minimum  
104 number of peptides, razor + unique peptides and unique peptides were all set to 1.  
105 Maximum false discovery rates - calculated by employing a reverse database strategy -  
106 were set to 0.01 at peptide and protein levels. Intensity-based absolute quantification  
107 values iBAQ (14) were calculated from MS intensities of unique+razor peptides. Statistical  
108 analyses were performed using ProStaR (15). Proteins identified in the reverse and  
109 contaminant databases, proteins only identified by site and proteins exhibiting less than

110 3 iBAQ values in one condition were discarded from the list. After log<sub>2</sub> transformation,  
111 intensity values were normalized by median centering before missing value imputation  
112 (replacing missing values by the 2.5 percentile value of each column); statistical testing  
113 was conducted using *limma* t-test. Differentially recovered proteins were sorted out using  
114 a log<sub>2</sub>(fold change) cut-off of 2 and a FDR threshold on remaining p-values of 1% using  
115 the Benjamini-Hochberg procedure. The different lists were then combined together. In  
116 total, this allows us to end up with a list of 2 852 quantified proteins.

### 117 **RT-qPCR**

118 Yield, purity and integrity of RNA were evaluated on Nanodrop and by agarose gel  
119 migration. Complementary DNA synthesis was carried using 3 µg of RNA with  
120 SuperScript III First-Strand Synthesis System (Invitrogen) with or without SuperScript III  
121 RT enzyme to assess the absence of genomic DNA. The CFX96 Real-Time system  
122 (BioRad) was used to amplify the cDNA and the quantification was based on use of SYBR  
123 green fluorescent molecules. cDNA was incubated with 5 µL of Gotaq qPCR master mix  
124 (Promega) and reverse and forward specific primers at a final concentration of 125 nM in  
125 a total volume of 10 µL. Cycling parameters of the real time PCR were 95°C for 2 min, 40  
126 cycles of 95°C for 15 s and 60°C for 45 s, and finally a melting curve from 65°C to 95°C  
127 by increment of 0.5°C for 5 s to assess the specificity of the amplification. To generate  
128 standard curves, serial dilutions of cDNA pool of the CLJ strains were used. The  
129 experiments were performed with three biological samples for each strain, in duplicate,  
130 and the results were analyzed with the CFX manager software (BioRad). The relative  
131 expression of mRNAs was calculated using the  $\Delta\Delta Cq$  method relative to *rpoD* reference  
132 Cq values. The graph was represented with the SEM (Standard Error of the Mean).

133 Statistical analysis was carried out using a non-parametric Mann-Whitney U test. The  $p$ -  
134 values  $< 0.05$  were considered as significant.

135

### 136 **Supplementary References**

- 137 1. Altschul SF, Madden TL, Schaffer AA, Zhang J, Zhang Z, Miller W, et al. Gapped  
138 BLAST and PSI-BLAST: a new generation of protein database search programs. *Nucleic*  
139 *acids research*. 1997 Sep 1;25(17):3389-402.
- 140 2. Clark K, Karsch-Mizrachi I, Lipman DJ, Ostell J, Sayers EW. GenBank. *Nucleic*  
141 *acids research*. 2016 Jan 4;44(D1):D67-72.
- 142 3. Darling AC, Mau B, Blattner FR, Perna NT. Mauve: multiple alignment of  
143 conserved genomic sequence with rearrangements. *Genome research*. 2004  
144 Jul;14(7):1394-403.
- 145 4. Rodriguez-R LM, Konstantinidis KT. The enveomics collection: a toolbox for  
146 specialized analyses of microbial genomes and metagenomes. *PeerJ Preprints*  
147 2016;4:e1900v1.
- 148 5. Wu S, Zhu Z, Fu L, Niu B, Li W. WebMGA: a customizable web server for fast  
149 metagenomic sequence analysis. *BMC genomics*. 2011 Sep 7;12:444.
- 150 6. Yu NY, Wagner JR, Laird MR, Melli G, Rey S, Lo R, et al. PSORTb 3.0: improved  
151 protein subcellular localization prediction with refined localization subcategories and  
152 predictive capabilities for all prokaryotes. *Bioinformatics*. 2010 Jul 1;26(13):1608-15.

- 153 7. Goldberg T, Hecht M, Hamp T, Karl T, Yachdav G, Ahmed N, et al. LocTree3  
154 prediction of localization. *Nucleic acids research*. 2014 Jul;42(Web Server issue):W350-  
155 5.
- 156 8. Li L, Stoeckert CJ, Jr., Roos DS. OrthoMCL: identification of ortholog groups for  
157 eukaryotic genomes. *Genome research*. 2003 Sep;13(9):2178-89.
- 158 9. Love MI, Huber W, Anders S. Moderated estimation of fold change and dispersion  
159 for RNA-seq data with DESeq2. *Genome biology*. 2014;15(12):550.
- 160 10. Elsen S, Huber P, Bouillot S, Coute Y, Fournier P, Dubois Y, et al. A type III  
161 secretion negative clinical strain of *Pseudomonas aeruginosa* employs a two-partner  
162 secreted exolysin to induce hemorrhagic pneumonia. *Cell host & microbe*. 2014 Feb  
163 12;15(2):164-76.
- 164 11. Casabona MG, Robert-Genthon M, Grunwald D, Attree I. Defining Lipoprotein  
165 Localisation by Fluorescence Microscopy. *Methods in molecular biology*. 2017;1615:65-  
166 74.
- 167 12. Casabona MG, Vandenbrouck Y, Attree I, Coute Y. Proteomic characterization of  
168 *Pseudomonas aeruginosa* PAO1 inner membrane. *Proteomics*. 2013 Aug;13(16):2419-  
169 23.
- 170 13. Cox J, Mann M. MaxQuant enables high peptide identification rates, individualized  
171 p.p.b.-range mass accuracies and proteome-wide protein quantification. *Nature*  
172 *biotechnology*. 2008 Dec;26(12):1367-72.
- 173 14. Swearingen MC, Mehta A, Mehta A, Nistico L, Hill PJ, Falzarano AR, et al. A novel  
174 technique using potassium permanganate and reflectance confocal microscopy to image

175 biofilm extracellular polymeric matrix reveals non-eDNA networks in *Pseudomonas*  
176 *aeruginosa* biofilms. *Pathogens and disease*. 2016 Feb;74(1):ftv104.

177 15. Wieczorek S, Combes F, Lazar C, Giai Gianetto Q, Gatto L, Dorffer A, et al.  
178 DAPAR & ProStaR: software to perform statistical analyses in quantitative discovery  
179 proteomics. *Bioinformatics*. 2017 Jan 1;33(1):135-6.

180

181

182

183 **Fig. S1 Details of whole genome comparison between PA7 and CLJ strains.**

184 The outer ring shows all the genes in the strains colored according to their COG (Clusters  
185 of Orthologous Groups) functional categories as listed on the bottom, and the three other  
186 rings represent the PA7 (orange), CLJ3 (green), and CLJ1 (red) genomes, respectively.  
187 White color indicates that the gene is absent from the genome, grey color indicates that  
188 the gene or its homolog is present in a different position in the genome, while black color  
189 in the CLJ rings represents gaps between contigs. The inner labels show the CLJ-specific  
190 regions and the outer labels are the PA7-specific regions (represented in RGPs or PSPA7  
191 locus numbers) described in Additional file 2: Table S1 and Table S2, respectively. (PDF  
192 6909 KB)

193

194 **Table S1** Genome assembly and annotation statistics (DOCX 17Ko)

195 **Table S2** RT-qPCR primers used in this study (DOCX 16Ko)



- 196 **Table S3** Specific regions of CLJ compared to PA7 (DOCX 17Ko)
- 197 **Table S4** Specific regions of PA7 compared to CLJ (DOCX 18Ko)
- 198 **Table S5** Genes in CLJ-SR14 (DOCX 18Ko)
- 199 **Table S6** Prediction of CLJ-ISL3 insertions between contigs of CLJ3 (XLSX 14Ko)
- 200 **Table S7** Differential proteomic analysis between CLJ1 and CLJ3 in total proteome,  
201 membrane proteome, and secretome proteome (XLSX 376Ko)
- 202 **Table S8** Differential gene expression analysis between CLJ1 and CLJ3 (XLSX 436Ko)
- 203 **Table S9** List of genes/proteins that are statistically significantly differentially expressed  
204 between CLJ1 and CLJ3 in both, RNA-Seq and in at least one of the proteomic datasets  
205 (XLSX 24K0)
- 206 **Table S10** CLJ phage-related region (DOCX 16Ko)
- 207

**Table S1.** Genome assembly and annotation statistics

|                                          | <b>CLJ1</b> | <b>CLJ3</b> |
|------------------------------------------|-------------|-------------|
| <b>Number of contigs/scaffolds</b>       | 68          | 135         |
| <b>Average coverage (x)</b>              | 98.3        | 96.9        |
| <b>Contig/scaffold size (bp)</b>         | 201-847201  | 1025-297138 |
| <b>Average contig/scaffold size (bp)</b> | 95801       | 47065       |
| <b>Contig/scaffold N50 (bp)</b>          | 456227      | 97517       |
| <b>Total genome size (bp)</b>            | 6514448     | 6353726     |
| <b>G+C content (%)</b>                   | 66.6        | 66.6        |
| <b>Protein coding sequences</b>          | 6259        | 6107        |
| <b>tRNA</b>                              | 62          | 57          |
| <b>rRNA</b>                              | 9           | 3           |

**Table S2.** RT-qPCR primers used in this study

| Name                           | 5'-3' sequence                                           | Amplicon size |
|--------------------------------|----------------------------------------------------------|---------------|
| qPCR-hcnB-F<br>qPCR-hcnB-R     | TACGGTGATCTGCCGTTGTG<br>GATCGCTGCAATAGCCGATG             | 152 bp        |
| qPCR-pvdE-F<br>qPCR-pvdE-R     | CCAATCCCGAACCTACCTG<br>TTCTCGCCGACGATGAAGAG              | 184 bp        |
| qPCR-ampDH3-F<br>qPCR-ampDH3-R | GCGACAACCTCAACGACACC<br>CATTCTTCGGCGTCATGTCC             | 165 bp        |
| qPCR-2958-F2<br>qPCR-2958-R2   | CGGCATCGAGCACTGCTACT<br>CCAGTTCGTGGCCGATGAT              | 152 bp        |
| qPCR-ccoG2-F<br>qPCR-ccoG2-R   | GCTGGACCTGGAAAGCCTGT<br>GGCGTCGTAGGAAACGATCA             | 160 bp        |
| qPCR-ccoN4-F<br>qPCR-ccoN4-R   | TGGGCAATACCACCACCAAG<br>CGGTGGTCAGGATGAACGAG             | 171 bp        |
| oprD-up<br>oprD-up             | GGGTTTCATCGAAGACAGCAG<br>TGCCTTGGGTGAAGCCGGATT           | 139 bp        |
| uvrD-up<br>uvrD-down           | CATATCCTGGTGGACGAGTTCC<br>CGCTGAACTGCTGGATGTTCTC         | 160 bp        |
| rpoD-qPCR F1<br>rpoD-qPCR R1   | GCG-CAA-CAG-CAA-TCT-CGT-CT<br>ATC-CGG-GGC-TGT-CTC-GAA-TA | 177 bp        |

**Table S3.** Specific regions of CLJ compared to PA7

| Region   | RGP    | CLJ1 locus | Number of genes | Features                                        |
|----------|--------|------------|-----------------|-------------------------------------------------|
| CLJ-SR1  | RGP66  | 0487-0494  | 8               | Phage-related                                   |
| CLJ-SR2  | RGP29* | 2128-2214  | 87              | PAGI-2-like island                              |
| CLJ-SR3  | RGP28  | 2316-2322  | 6               | Mobile element proteins                         |
| CLJ-SR4  | RGP27  | 2415-2573  | 160             | Dit island                                      |
| CLJ-SR5  | RGP72  | 2579-2583  | 5               | D-galactonate catabolism                        |
| CLJ-SR6  | RGP26  | 2615-2621  | 7               | Phage-related; lytic enzymes                    |
| CLJ-SR7  | RGP23  | 2917-2924  | 7               | Mobile element proteins; possible DNA helicase  |
| CLJ-SR8  |        | 3303-3309  | 7               | ABC transporter ATP-binding protein             |
| CLJ-SR9  |        | 3607-3616  | 9               |                                                 |
| CLJ-SR10 | RGP15  | 3774-3784  | 11              | Threonine dehydratase; ABC transporter proteins |
| CLJ-SR11 |        | 4314-4301  | 14              | AlpBCDE-lysis cassette, phage-related           |
| CLJ-SR12 |        | 4838-4876  | 39              | Pyrrroquinoline quinone synthesis proteins      |
| CLJ-SR13 |        | 5192-5203  | 10              | Phage related; accessory cholera enterotoxin    |
| CLJ-SR14 |        | 5811-5871  | 55              | Heavy metal resistance                          |
| CLJ-SR15 |        | 6156-6161  | 6               | Phage-related                                   |

RGP: region of genomic plasticity, \*CLJ strains do not share any genes with PA7 in the RGP

**Table S4.** Specific regions of PA7 compared to CLJ

| PSPA7 numbering | Number of genes | RGP    | Features                                                                        |
|-----------------|-----------------|--------|---------------------------------------------------------------------------------|
| 0069-0139       | 71              | RGP63* | Type I restriction-modification system; mercury resistance cluster              |
| 0263-0267       | 5               |        | Sulfate ester transport system                                                  |
| 0270-0274       | 5               |        |                                                                                 |
| 0278-0283       | 6               |        | <i>tonB2-exbB1-exbD1</i> operon                                                 |
| 0355-0369       | 15              | RGP64* | Phage-related                                                                   |
| 0776-0788       | 12              | RGP4*  | Phage-related                                                                   |
| 1586-1593       | 8               |        | Polymyxin and cationic antimicrobial peptide resistance cluster                 |
| 1678-1685       | 8               |        | Sulfur starvation utilization operon                                            |
| 2109-2112       | 4               | RGP70  | Probable transposase                                                            |
| 2363-2435       | 73              | RGP56* | Phage-related                                                                   |
| 2515-2526       | 10              | RGP28  |                                                                                 |
| 2790-2795       | 6               | RGP25  | Hemagglutinins                                                                  |
| 2886-2908       | 23              |        | Hcp secretion island-3 encoded type VI secretion system (H3-T6SS)               |
| 2911-2917       | 7               |        | Methionine ABC transporters; monooxygenases                                     |
| 2930-2935       | 6               |        | Alkanesulfonate assimilation; nitrate and nitrite ammonification                |
| 3034-3071       | 37              | RGP23  | Pyocin killing protein; phage-related                                           |
| 3695-3747       | 53              | RGP75* | Conjugal transfer protein cluster; resistance genes; transcriptional regulators |
| 4281-4289       | 9               | RGP9   | Rieske family iron-sulfur cluster-binding protein                               |
| 4427-4530       | 103             | RGP7   | Type IV B pilus protein cluster                                                 |
| 5053-5075       | 23              | RGP78  | Phage-related                                                                   |
| 5143-5160       | 17              | RGP60* | Phage-related                                                                   |
| 5297-5302       | 6               |        | Fimbrial chaperone/usher pathway E operon                                       |
| 5324-5357       | 34              | RGP42  | Mobile element proteins; Streptomycin phosphotransferase                        |
| 5364-5378       | 15              | RGP42  | Phage-related                                                                   |
| 5708-5718       | 11              |        | Arginine:pyruvate transaminase; 2-ketoarginine decarboxylase                    |
| 6033-6063       | 31              | RGP79* | Type I restriction-modification system                                          |

RGP: region of genomic plasticity, \*PA7 does not share any genes with CLJ strains in the RGP.

**Table S5.** Genes in CLJ-SR14

| PA7 | CLJ1      | CLJ3      | RAST annotation                                                                    |
|-----|-----------|-----------|------------------------------------------------------------------------------------|
| NA  | CLJ1_5811 | CLJ3_5608 | MG(2+) CHELATASE FAMILY PROTEIN / ComM-related protein                             |
| NA  | CLJ1_5814 | CLJ3_5609 | hypothetical protein                                                               |
| NA  | CLJ1_5815 | CLJ3_5610 | hypothetical protein                                                               |
| NA  | CLJ1_5817 | CLJ3_0003 | hypothetical protein                                                               |
| NA  | CLJ1_5818 | CLJ3_0004 | Error-prone, lesion bypass DNA polymerase V (UmuC)                                 |
| ns  | CLJ1_5819 | CLJ3_0005 | hypothetical protein                                                               |
| ns  | CLJ1_5820 | CLJ3_0006 | Mercuric ion reductase (EC 1.16.1.1)                                               |
| ns  | CLJ1_5821 | CLJ3_0007 | Mercuric transport protein, MerC                                                   |
| ns  | CLJ1_5822 | CLJ3_0008 | Periplasmic mercury(+2) binding protein                                            |
| ns  | CLJ1_5823 | CLJ3_0009 | Mercuric transport protein, MerT                                                   |
| ns  | CLJ1_5824 | CLJ3_0010 | Mercuric resistance operon regulatory protein                                      |
| ns  | CLJ1_5825 | CLJ3_0011 | hypothetical protein                                                               |
| NA  | CLJ1_5826 | CLJ3_0012 | Sterol desaturase                                                                  |
| NA  | CLJ1_5827 | CLJ3_0013 | Transcriptional regulator, AraC family                                             |
| NA  | CLJ1_5828 | CLJ3_0014 | Lipoprotein signal peptidase (EC 3.4.23.36)                                        |
| NA  | CLJ1_5829 | CLJ3_0015 | hypothetical protein                                                               |
| NA  | CLJ1_5830 | CLJ3_0016 | Cobalt-zinc-cadmium resistance protein CzcD                                        |
| NA  | CLJ1_5831 | CLJ3_0017 | COG3267: Type II secretory pathway, component ExeA (predicted ATPase)              |
| NA  | CLJ1_5832 | CLJ3_0018 | FIG131328: Predicted ATP-dependent endonuclease of the OLD family                  |
| ns  | CLJ1_5833 | CLJ3_0019 | Mobile element protein                                                             |
| ns  | CLJ1_5834 | CLJ3_0020 | Mobile element protein                                                             |
| NA  | CLJ1_5836 | CLJ3_6032 | transcriptional regulator MvaT, P16 subunit, putative                              |
| ns  | CLJ1_5837 | CLJ3_6031 | Gifsy-2 prophage protein                                                           |
| ns  | CLJ1_5838 | CLJ3_6030 | Error-prone repair protein UmuD                                                    |
| ns  | CLJ1_5839 | CLJ3_6029 | Error-prone, lesion bypass DNA polymerase V (UmuC)                                 |
| NA  | CLJ1_5840 | CLJ3_6028 | putative (L31491) ORF2; putative [Plasmid pTOM9]                                   |
| NA  | CLJ1_5841 | CLJ3_6027 | putative ORF1 [Plasmid pTOM9]                                                      |
| NA  | CLJ1_5842 | CLJ3_6026 | NreA-like protein                                                                  |
| NA  | CLJ1_5843 | CLJ3_6025 | Inner membrane protein                                                             |
| NA  | CLJ1_5844 | CLJ3_6024 | probable membrane protein YPO3302                                                  |
| NA  | CLJ1_5845 | CLJ3_6023 | hypothetical protein                                                               |
| NA  | CLJ1_5846 | CLJ3_6022 | hypothetical protein                                                               |
| NA  | CLJ1_5847 | CLJ3_6021 | Chromate transport protein ChrA                                                    |
| NA  | CLJ1_5848 | CLJ3_6020 | Chromate resistance protein ChrB                                                   |
| NA  | CLJ1_5849 | CLJ3_6019 | Phage integrase family protein                                                     |
| NA  | CLJ1_5851 | CLJ3_6018 | RuBisCO operon transcriptional regulator CbbR                                      |
| NA  | CLJ1_5852 | CLJ3_6017 | Phosphonate dehydrogenase (EC 1.20.1.1) (NAD-dependent phosphite dehydrogenase)    |
| NA  | CLJ1_5853 | CLJ3_6016 | Phosphonate ABC transporter permease protein phnE (TC 3.A.1.9.1)                   |
| NA  | CLJ1_5854 | CLJ3_6015 | Phosphonate ABC transporter phosphate-binding periplasmic component (TC 3.A.1.9.1) |
| NA  | CLJ1_5855 | CLJ3_6014 | Phosphonate ABC transporter ATP-binding protein (TC 3.A.1.9.1)                     |
| ns  | CLJ1_5856 | CLJ3_6013 | FIG002188: hypothetical protein                                                    |
| ns  | CLJ1_5857 | CLJ3_6012 | FIG067310: hypothetical protein                                                    |
| NA  | CLJ1_5858 | CLJ3_6011 | hypothetical protein                                                               |
| ns  | CLJ1_5859 | CLJ3_6010 | Long-chain-fatty-acid--CoA ligase (EC 6.2.1.3)                                     |
| NA  | CLJ1_5860 | gap       | Enoyl-CoA hydratase (EC 4.2.1.17)                                                  |
| NA  | CLJ1_5861 | ns        | Mobile element protein                                                             |
| NA  | CLJ1_5862 | ns        | Mobile element protein                                                             |
| NA  | CLJ1_5863 | gap       | transcriptional regulator, TetR family                                             |
| NA  | CLJ1_5864 | CLJ3_5612 | Error-prone, lesion bypass DNA polymerase V (UmuC)                                 |
| NA  | CLJ1_5866 | ns        | Mobile element protein                                                             |

|    |           |           |                        |
|----|-----------|-----------|------------------------|
| NA | CLJ1_5867 | CLJ3_5613 | hypothetical protein   |
| NA | CLJ1_5868 | CLJ3_5614 | Mobile element protein |
| NA | CLJ1_5869 | CLJ3_5615 | hypothetical protein   |
| NA | CLJ1_5870 | CLJ3_5616 | hypothetical protein   |
| NA | CLJ1_5871 | CLJ3_5617 | hypothetical protein   |

NA: no orthologous gene is found in the corresponding genome, ns: orthologous gene(s) is/are found in other location(s) in the corresponding genome, gap: the gene location corresponds to a gap between contigs in the corresponding genome.

**Table S10.** CLJ phage-related regions.

| CLJ1 locus       | Region                    | Number of genes | Corresponding PA7 locus | Mobility gene present |
|------------------|---------------------------|-----------------|-------------------------|-----------------------|
| <b>0462-0497</b> | RGP66 (including CLJ-SR1) | 36              | PSPA7_0678-0716         | Integrase             |
| <b>0535-0557</b> | RGP3                      | 23              | PSPA7_0754-0775         | None                  |
| <b>2607-2624</b> | RGP26 (including CLJ-SR6) | 18              | PSPA7_2648-2661         | Integrase             |
| <b>4295-4314</b> | Including CLJ-SR11        | 20              | PSPA7_4602-4606         | None                  |
| <b>4778-4791</b> | RGP78                     | 14              | PSPA7_5040-5080         | Integrase             |
| <b>5192-5203</b> | CLJ-SR13                  | 12              | NA                      | Integrase             |
| <b>5758-5774</b> | Including RGP6            | 17              | PSPA7_4699-4703         | Integrase             |
| <b>6156-6161</b> | CLJ-SR15                  | 6               | NA                      | None                  |

NA: not applicable

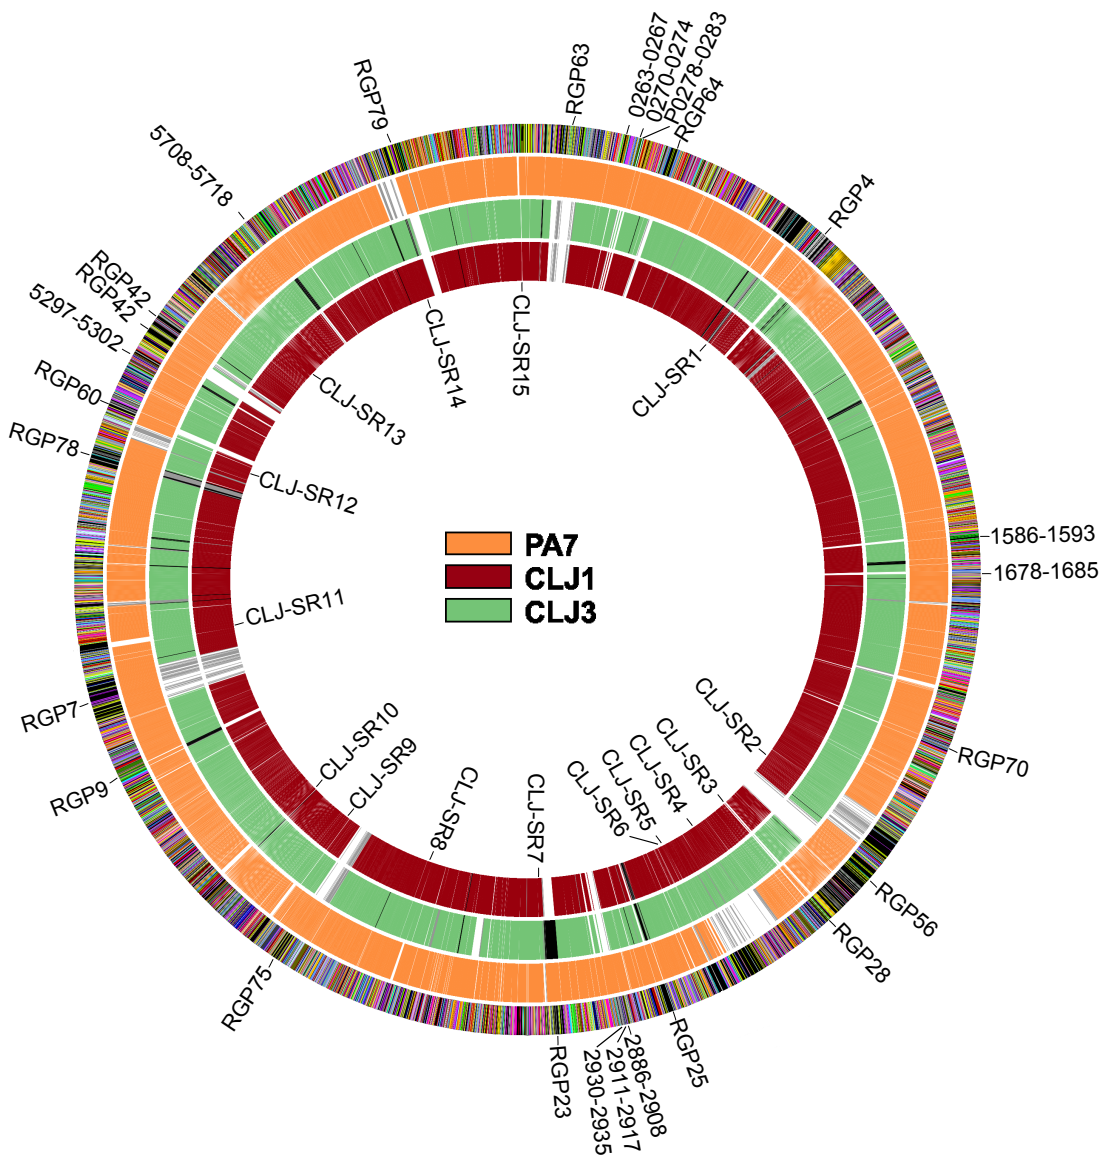

**COG (Clusters of Orthologous Groups) functional categories**

- |                                                                                                                                                                                                                                                                                                                                                                                                                                                                                                                                                                                                                                                                                                                                                                                                                                                                                                                                                                                                                                                                                                                                                                                                                                                                                                                                                                                                                                                                                                                                                                                                                                                                                                                                                                                                                                                                                                                                                                                                                                                                                                                                                                                                                                                                                                                                                                                                |                                                                                                                                                                                                                                                                                                                                                                                                                                                                                                                                                                                                                                                                                                                                                                                                                                                                                                                                                                                                                                                                                                                                                                                                                                                                                                                                                                                                                                                                                                                                                                                                                                                                                                                                                                                                                                                                                                                                                                                                                                                                                                                                                           |
|------------------------------------------------------------------------------------------------------------------------------------------------------------------------------------------------------------------------------------------------------------------------------------------------------------------------------------------------------------------------------------------------------------------------------------------------------------------------------------------------------------------------------------------------------------------------------------------------------------------------------------------------------------------------------------------------------------------------------------------------------------------------------------------------------------------------------------------------------------------------------------------------------------------------------------------------------------------------------------------------------------------------------------------------------------------------------------------------------------------------------------------------------------------------------------------------------------------------------------------------------------------------------------------------------------------------------------------------------------------------------------------------------------------------------------------------------------------------------------------------------------------------------------------------------------------------------------------------------------------------------------------------------------------------------------------------------------------------------------------------------------------------------------------------------------------------------------------------------------------------------------------------------------------------------------------------------------------------------------------------------------------------------------------------------------------------------------------------------------------------------------------------------------------------------------------------------------------------------------------------------------------------------------------------------------------------------------------------------------------------------------------------|-----------------------------------------------------------------------------------------------------------------------------------------------------------------------------------------------------------------------------------------------------------------------------------------------------------------------------------------------------------------------------------------------------------------------------------------------------------------------------------------------------------------------------------------------------------------------------------------------------------------------------------------------------------------------------------------------------------------------------------------------------------------------------------------------------------------------------------------------------------------------------------------------------------------------------------------------------------------------------------------------------------------------------------------------------------------------------------------------------------------------------------------------------------------------------------------------------------------------------------------------------------------------------------------------------------------------------------------------------------------------------------------------------------------------------------------------------------------------------------------------------------------------------------------------------------------------------------------------------------------------------------------------------------------------------------------------------------------------------------------------------------------------------------------------------------------------------------------------------------------------------------------------------------------------------------------------------------------------------------------------------------------------------------------------------------------------------------------------------------------------------------------------------------|
| <ul style="list-style-type: none"> <li><span style="display: inline-block; width: 15px; height: 15px; background-color: #8B4513; border: 1px solid black; margin-right: 5px;"></span> RNA processing and modification</li> <li><span style="display: inline-block; width: 15px; height: 15px; background-color: #6B8E23; border: 1px solid black; margin-right: 5px;"></span> Energy production and conversion</li> <li><span style="display: inline-block; width: 15px; height: 15px; background-color: #9B59B6; border: 1px solid black; margin-right: 5px;"></span> Cell cycle control, cell division, chromosome partitioning</li> <li><span style="display: inline-block; width: 15px; height: 15px; background-color: #E74C3C; border: 1px solid black; margin-right: 5px;"></span> Amino acid transport and metabolism</li> <li><span style="display: inline-block; width: 15px; height: 15px; background-color: #F08080; border: 1px solid black; margin-right: 5px;"></span> Nucleotide transport and metabolism</li> <li><span style="display: inline-block; width: 15px; height: 15px; background-color: #FF69B4; border: 1px solid black; margin-right: 5px;"></span> Carbohydrate transport and metabolism</li> <li><span style="display: inline-block; width: 15px; height: 15px; background-color: #FFDAB9; border: 1px solid black; margin-right: 5px;"></span> Coenzyme transport and metabolism</li> <li><span style="display: inline-block; width: 15px; height: 15px; background-color: #FFA500; border: 1px solid black; margin-right: 5px;"></span> Lipid transport and metabolism</li> <li><span style="display: inline-block; width: 15px; height: 15px; background-color: #FFD700; border: 1px solid black; margin-right: 5px;"></span> Translation, ribosomal structure and biogenesis</li> <li><span style="display: inline-block; width: 15px; height: 15px; background-color: #FFFF00; border: 1px solid black; margin-right: 5px;"></span> Transcription</li> <li><span style="display: inline-block; width: 15px; height: 15px; background-color: #90EE90; border: 1px solid black; margin-right: 5px;"></span> Replication, recombination and repair</li> <li><span style="display: inline-block; width: 15px; height: 15px; background-color: #32CD32; border: 1px solid black; margin-right: 5px;"></span> Cell wall/membrane/envelope biogenesis</li> </ul> | <ul style="list-style-type: none"> <li><span style="display: inline-block; width: 15px; height: 15px; background-color: #2E8B57; border: 1px solid black; margin-right: 5px;"></span> Cell motility</li> <li><span style="display: inline-block; width: 15px; height: 15px; background-color: #00008B; border: 1px solid black; margin-right: 5px;"></span> Posttranslational modification, protein turnover, chaperones</li> <li><span style="display: inline-block; width: 15px; height: 15px; background-color: #6495ED; border: 1px solid black; margin-right: 5px;"></span> Inorganic ion transport and metabolism</li> <li><span style="display: inline-block; width: 15px; height: 15px; background-color: #ADD8E6; border: 1px solid black; margin-right: 5px;"></span> Secondary metabolites biosynthesis, transport and catabolism</li> <li><span style="display: inline-block; width: 15px; height: 15px; background-color: #00CED1; border: 1px solid black; margin-right: 5px;"></span> Signal transduction mechanisms</li> <li><span style="display: inline-block; width: 15px; height: 15px; background-color: #ADD8E6; border: 1px solid black; margin-right: 5px;"></span> Intracellular trafficking, secretion, and vesicular transport</li> <li><span style="display: inline-block; width: 15px; height: 15px; background-color: #800080; border: 1px solid black; margin-right: 5px;"></span> Defense mechanisms</li> <li><span style="display: inline-block; width: 15px; height: 15px; background-color: #DDA0DD; border: 1px solid black; margin-right: 5px;"></span> Multiple classes</li> <li><span style="display: inline-block; width: 15px; height: 15px; background-color: #D3D3D3; border: 1px solid black; margin-right: 5px;"></span> General function prediction only</li> <li><span style="display: inline-block; width: 15px; height: 15px; background-color: #A9A9A9; border: 1px solid black; margin-right: 5px;"></span> Function unknown</li> <li><span style="display: inline-block; width: 15px; height: 15px; background-color: #000000; border: 1px solid black; margin-right: 5px;"></span> No COG</li> </ul> |
|------------------------------------------------------------------------------------------------------------------------------------------------------------------------------------------------------------------------------------------------------------------------------------------------------------------------------------------------------------------------------------------------------------------------------------------------------------------------------------------------------------------------------------------------------------------------------------------------------------------------------------------------------------------------------------------------------------------------------------------------------------------------------------------------------------------------------------------------------------------------------------------------------------------------------------------------------------------------------------------------------------------------------------------------------------------------------------------------------------------------------------------------------------------------------------------------------------------------------------------------------------------------------------------------------------------------------------------------------------------------------------------------------------------------------------------------------------------------------------------------------------------------------------------------------------------------------------------------------------------------------------------------------------------------------------------------------------------------------------------------------------------------------------------------------------------------------------------------------------------------------------------------------------------------------------------------------------------------------------------------------------------------------------------------------------------------------------------------------------------------------------------------------------------------------------------------------------------------------------------------------------------------------------------------------------------------------------------------------------------------------------------------|-----------------------------------------------------------------------------------------------------------------------------------------------------------------------------------------------------------------------------------------------------------------------------------------------------------------------------------------------------------------------------------------------------------------------------------------------------------------------------------------------------------------------------------------------------------------------------------------------------------------------------------------------------------------------------------------------------------------------------------------------------------------------------------------------------------------------------------------------------------------------------------------------------------------------------------------------------------------------------------------------------------------------------------------------------------------------------------------------------------------------------------------------------------------------------------------------------------------------------------------------------------------------------------------------------------------------------------------------------------------------------------------------------------------------------------------------------------------------------------------------------------------------------------------------------------------------------------------------------------------------------------------------------------------------------------------------------------------------------------------------------------------------------------------------------------------------------------------------------------------------------------------------------------------------------------------------------------------------------------------------------------------------------------------------------------------------------------------------------------------------------------------------------------|

**Figure S1**

**Table S6.** Prediction of CLJ-ISL3 insertions between contigs of CLJ3, as described in Materials and Methods

| Flanking contigs | Inverted repeat at contigs' ends | Found by panISa | Truncated or deleted gene(s) CLJ1/PA7/PA01 gene numbers            | Gene function/remarks                                                        | presence in CLJ1 |
|------------------|----------------------------------|-----------------|--------------------------------------------------------------------|------------------------------------------------------------------------------|------------------|
| 006-007          | Yes                              | Yes             | CLJ1_0230/PSPA7_0328/PA0243                                        | transcriptional regulator, TetR family                                       | No               |
| 007-008          | Only in 008                      | Yes             | CLJ1_0262/PSPA7_0376/PA0285                                        | GGDEF domain protein                                                         | No               |
| 019-020          | Yes                              | Yes             | CLJ1_0698/PSPA7_0954/PA4136                                        | MFS family transporter                                                       | No               |
| 022-023          | Yes                              | Yes             | CLJ1_0863/PSPA7_1123/PA3985                                        | Putative membrane protein                                                    | No               |
| 023-024          | Only in 023                      | Yes             | hupN/CLJ1_0909/PSPA7_1168/PA3940                                   | DNA-binding protein HU-beta                                                  | No               |
| 026-063          | Only in 026                      | No              | CLJ1_3101/PSPA7_3246/PA2041, mexX/CLJ1_3125/PSPA7_3269/PA2019      | mexX, puu permease, multidrug efflux/next to CLJ3 deletion                   | Yes              |
| 030-031          | Only in 030                      | Yes             | rhIBRL/CLJ1_1381-1383/PSPA7_1648-1650/PA3478-3476                  | quorum-sensing regulon                                                       | No               |
| 033-034          | Yes                              | Yes             | CLJ1_1423/PSPA7_1697/PA3429                                        | putative epoxide hydrolase                                                   | No               |
| 035-036          | Yes                              | Yes             | CLJ1_1578/PSPA7_1845/PA3276                                        | hypothetical protein                                                         | No               |
| 039-040          | Yes                              | Yes             | wbpL/CLJ1_1777/PSPA7_1935/PA3193                                   | OSA region                                                                   | No               |
| 045-046          | Yes                              | Yes             | CLJ1_2247/PSPA7_2441                                               | hypothetical protein                                                         | No               |
| 060-061          | Yes                              | Yes             | hcnB/CLJ1_2955/PSPA7_3102/PA2194                                   | HCN synthase                                                                 | No               |
| 067-068          | Yes                              | Yes             | CLJ1_3400/PSPA7_3548/PA1759                                        | transcriptional activator of maltose regulon, MalT                           | No               |
| 068-069          | Yes                              | Yes             | CLJ1_3511/PSPA7_3656/PA1617                                        | putative AMP-binding protein                                                 | No               |
| 074-131          | Yes                              | No              | fgtA/CLJ1_4219/PSPA7_4280/PA1091                                   | flagellum                                                                    | Yes*             |
| 131-075          | Yes                              | No              | fglL/CLJ1_4222/PSPA7_4290/PA1087                                   | flagellum                                                                    | Yes*             |
| 075-076          | Yes                              | Yes             | oprD/CLJ1_4366/PSPA7_4550/PA0958                                   | antibiotic flux                                                              | No               |
| 080-081          | Only in 080                      | Yes             | CLJ1_5754-5755/PSPA7_4791-4792/PA0732-0731                         | hypothetical proteins                                                        | No               |
| 083-084          | Yes                              | Yes             | imuC/dnaE2/CLJ1_4582-4585/PSPA7_4841/PA0669                        | mutagenesis                                                                  | Yes              |
| 093-094          | Yes                              | Yes             | ampD/CLJ1_4891/PSPA7_5139/PA4522                                   | AmpD, beta-lactamase expression regulator                                    | No               |
| 096-097          | Yes                              | Yes             | CLJ1_5005/PSPA7_5275/PA4629                                        | probable transmembrane protein                                               | No               |
| 100-101          | Yes                              | No              | CLJ1_5197                                                          | Hypothetical protein in CLJ-SR13                                             | No               |
| 104-105          | Yes                              | Yes             | pilM/CLJ1_5446/PSPA7_5781/PA5044                                   | pili                                                                         | Yes              |
| 105-106          | Only in 105                      | Yes             | dctQM/CLJ1_5570-5571/PSPA7_5907-5908/PA5168-5169                   | TRAP-type C4-dicarboxylate transport system small & large permease component | No               |
| 107-108          | Only in 107                      | Yes             | yjbQ/CLJ1_5806/PSPA7_6028/PA5286, amtB/CLJ1_5808/PSPA7_6029/PA5286 | hypothetical protein, ammonium transporter                                   | No               |
| 077-048          | Yes                              | No              | None                                                               | in CLJ-SR4, also a gap in CLJ1, between CLJ1_2557&2558                       | Yes              |
| 010-011          | Yes                              | Yes             | None                                                               | between CLJ1_0366&0368/PSPA7_0480&0481                                       | No               |
| 011-012          | Yes                              | Yes             | None                                                               | between CLJ1_3881&3880/PSPA7_0593&0594                                       | No               |
| 042-043          | Yes                              | Yes             | None                                                               | between CLJ1_2116&2117/PSPA7_2324&2325                                       | No               |
| 029-030          | Yes                              | Yes             | None                                                               | between CLJ1_1258&1259/PSPA7_1518&1519                                       | No               |
| 008-009          | Yes                              | Yes             | None                                                               | between CLJ1_0273&0274/PSPA7_0387&0388                                       | No               |
| 037-038          | Yes                              | Yes             | None                                                               | OSA region/between CLJ1_1764&1765/PSPA7_1971&1972                            | No               |
| 009-010          | Yes                              | Yes             | None                                                               | between CLJ1_0295&0296/PSPA7_0409&0410                                       | No               |
| 058-059          | Yes                              | Yes             | None                                                               | between CLJ1_1706&1707/PSPA7_2982&2983                                       | No               |
| 123-079          | Yes                              | No              | None                                                               | in RGP6, between CLJ1_5767&5768                                              | No               |
| 079-080          | Yes                              | Yes             | None                                                               | between CLJ1_5718&5720/PSPA7_4757&4759                                       | No               |
| 101-102          | Yes                              | Yes             | None                                                               | between CLJ1_5292&5293/PSPA7_5613&5614                                       | No               |
| 041-042          | Yes                              | Yes             | None                                                               | between xcpZ&IRNAVal/CLJ1_1825&rna21/PSPA7_2038&2039/PA3095&3094.3           | No               |
| 089-090          | Yes                              | Yes             | None                                                               | between roxS&hypothetical/CLJ1_4819&4820/PSPA7_5108&5109/PA4494&4495         | No               |
| 097-098          | Yes                              | Yes             | None                                                               | In place of cupE1-6/between CLJ1_5026&5027/PSPA7_5296&5303/PA4647&4654       | No               |

\* The two ISs probably recombined in CLJ1 creating a deletion between truncated *fgtA* and *fglL* genes
